# Supplementary material
Source: PubMed Central journal article supplement (PMC8361846)
Supplement: NIHMS1725998-supplement-Ferreira_et_al_Supplemental_material.pdf [file NIHMS1725998-supplement-Ferreira_et_al_Supplemental_material.pdf]

## **Supplemental Material**

Supplemental Table 1. Protein names and respective Olink® panel sorted in alphabetical order

| Protein full name                                                | Entry name   | Olink® Panel* | Uniprot ID** |
|------------------------------------------------------------------|--------------|---------------|--------------|
| Angiotensin-converting enzyme 2                                  | ACE2         | CVD II        | Q9BYF1       |
| Adenosine Deaminase                                              | ADA          | INF           | P00813       |
| Adisintegrin and metalloproteinase with thrombospondin motifs 13 | ADAMTS13     | CVD II        | Q76LX8       |
| ADM                                                              | ADM          | CVD II        | P35318       |
| Agouti-related protein                                           | AGRP         | CVD II        | O00253       |
| CD166 antigen                                                    | ALCAM        | CVD III       | Q13740       |
| Protein AMBP                                                     | AMBP         | CVD II        | P02760       |
| Angiopoietin-1                                                   | ANG1         | CVD II        | Q15389       |
| Aminopeptidase N                                                 | APN          | CVD III       | P15144       |
| Axin-1                                                           | AXIN1        | INF           | O15169       |
| Tyrosine-protein kinase receptor UFO                             | AXL          | CVD III       | P30530       |
| Azurocidin                                                       | AZU1         | CVD III       | P20160       |
| Brain-derived neurotrophic factor                                | BDNF         | INF           | P23560       |
| Beta-nerve growth factor                                         | BETANGF      | INF           | P01138       |
| Bleomycin hydrolase                                              | BLMHYDROLASE | CVD III       | Q13867       |
| Bone morphogenetic protein 6                                     | BMP6         | CVD II        | P22004       |
| Natriuretic peptides B                                           | BNP          | CVD II        | P16860       |
| Eukaryotic translation initiation factor 4E-binding protein 1    | BP1_4E       | INF           | Q13541       |
| Carbonic anhydrase 5A, mitochondrial                             | CA5A         | CVD II        | P35218       |
| Caspase-3                                                        | CASP3        | CVD III       | P42574       |
| Caspase 8                                                        | CASP8        | INF           | Q14790       |
| Eotaxin-1                                                        | CCL11        | INF           | P51671       |
| C-C motif chemokine 15                                           | CCL15        | CVD III       | Q16663       |
| C-C motif chemokine 16                                           | CCL16        | CVD III       | O15467       |
| C-C motif chemokine 17                                           | CCL17        | CVD II        | Q92583       |
| C-C motif chemokine 19                                           | CCL19        | INF           | Q99731       |
| C-C motif chemokine 20                                           | CCL20        | INF           | P78556       |
| C-C motif chemokine 22                                           | CCL22        | CVD III       | O00626       |
| C-C motif chemokine 23                                           | CCL23        | INF           | P55773       |
| C-C motif chemokine 24                                           | CCL24        | CVD III       | O00175       |
| C-C motif chemokine 25                                           | CCL25        | INF           | O15444       |
| C-C motif chemokine 28                                           | CCL28        | INF           | Q9NRJ3       |
| C-C motif chemokine 3                                            | CCL3         | CVD II        | P10147       |
| C-C motif chemokine 4                                            | CCL4         | INF           | P13236       |
| Scavenger receptor cysteine-rich type 1 protein M130             | CD163        | CVD III       | Q86VB7       |
| Natural killer cell receptor 2B4                                 | CD244        | INF           | Q9BZW8       |
| T-cell surface glycoprotein CD4                                  | CD4          | CVD II        | P01730       |
| CD40L receptor                                                   | CD40         | INF           | P25942       |
| CD40 ligand                                                      | CD40L        | CVD II        | P29965       |
| T-cell surface glycoprotein CD5                                  | CD5          | INF           | P06127       |
| T cell surface glycoprotein CD6                                  | CD6          | INF           | P30203       |
| SLAM family member 5                                             | CD84         | CVD II        | Q9UIB8       |
| Complement component C1q receptor                                | CD93         | CVD III       | Q9NPY3       |
| CUB domain-containing protein 1                                  | CDCP1        | INF           | Q9H5V8       |
| Cadherin-5                                                       | CDH5         | CVD III       | P33151       |
| Carcinoembryonic antigen-related cell adhesion molecule 8        | CEACAM8      | CVD II        | P31997       |

|                                                               |        |         |        |
|---------------------------------------------------------------|--------|---------|--------|
| Chitinase-3-like protein 1                                    | CHI3L1 | CVD III | P36222 |
| Chitotriosidase-1                                             | CHIT1  | CVD III | Q13231 |
| Contactin-1                                                   | CNTN1  | CVD III | Q12860 |
| Collagen alpha-1(I) chain                                     | COL1A1 | CVD III | P02452 |
| Carboxypeptidase A1                                           | CPA1   | CVD III | P15085 |
| Carboxypeptidase B                                            | CPB1   | CVD III | P15086 |
| Macrophage colony-stimulating factor 1                        | CSF1   | INF     | P09603 |
| Cystatin D                                                    | CST5   | INF     | P28325 |
| Cystatin-B                                                    | CSTB   | CVD III | P04080 |
| Chymotrypsin C                                                | CTRC   | CVD II  | Q99895 |
| Cathepsin D                                                   | CTSD   | CVD III | P07339 |
| Cathepsin L1                                                  | CTSL1  | CVD II  | P07711 |
| Cathepsin Z                                                   | CTSZ   | CVD III | Q9UBR2 |
| Fractalkine                                                   | CX3CL1 | INF     | P78423 |
| C-X-C motif chemokine 1 (CVD2)                                | CXCL1  | CVD II  | P09341 |
| C-X-C motif chemokine 10                                      | CXCL10 | INF     | P02778 |
| C-X-C motif chemokine 11                                      | CXCL11 | INF     | O14625 |
| C-X-C motif chemokine 16                                      | CXCL16 | CVD III | Q9H2A7 |
| C-X-C motif chemokine 5                                       | CXCL5  | INF     | P42830 |
| C-X-C motif chemokine 6                                       | CXCL6  | INF     | P80162 |
| C-X-C motif chemokine 9                                       | CXCL9  | INF     | Q07325 |
| Decorin                                                       | DCN    | CVD II  | P07585 |
| 2,4-dienoyl-CoA reductase, mitochondrial                      | DECR1  | CVD II  | Q16698 |
| Dickkopf-related protein 1                                    | DKK1   | CVD II  | O94907 |
| Azurocidin                                                    | DLK1   | CVD III | P80370 |
| Delta and Notch-like epidermal growth factor-related receptor | DNER   | INF     | Q8NFT8 |
| Epidermal growth factor receptor                              | EGFR   | CVD III | P00533 |
| Protein S100-A12                                              | ENRAGE | INF     | P80511 |
| Epithelial cell adhesion molecule                             | EPCAM  | CVD III | P16422 |
| Ephrin type-B receptor 4                                      | EPHB4  | CVD III | P54760 |
| Fatty acid-binding protein, intestinal                        | FABP2  | CVD II  | P12104 |
| Fatty acid-binding protein, adipocyte                         | FABP4  | CVD III | P15090 |
| Tumor necrosis factor receptor superfamily member 6           | FAS    | CVD III | P25445 |
| Fibroblast growth factor 19                                   | FGF19  | INF     | O95750 |
| Fibroblast growth factor 21 (CVD2)                            | FGF21  | CVD II  | Q9NSA1 |
| Fibroblast growth factor 23 (CVD2)                            | FGF23  | CVD II  | Q9GZV9 |
| Fibroblast growth factor 5                                    | FGF5   | INF     | P12034 |
| Fms-related tyrosine kinase 3 ligand                          | FLT3L  | INF     | P49771 |
| Follistatin                                                   | FS     | CVD II  | P19883 |
| Galectin-3                                                    | GAL3   | CVD III | P17931 |
| Galectin-4                                                    | GAL4   | CVD III | P56470 |
| Galectin-9                                                    | GAL9   | CVD II  | O00182 |
| Growth/differentiation factor 15                              | GDF15  | CVD III | Q99988 |
| Growth/differentiation factor 2                               | GDF2   | CVD II  | Q9UK05 |
| Growth hormone                                                | GH     | CVD II  | P01241 |
| Gastric intrinsic factor                                      | GIF    | CVD II  | P27352 |
| Lactoylglutathione lyase                                      | GLO1   | CVD II  | Q04760 |
| Granulins                                                     | GRN    | CVD III | P28799 |
| Gastrotropin                                                  | GT     | CVD II  | P51161 |
| Hydroxyacid oxidase 1                                         | HAOX1  | CVD II  | Q9UJM8 |
| Proheparin-binding EGF-like growth factor                     | HBEGF  | CVD II  | Q99075 |

|                                                              |                      |         |        |
|--------------------------------------------------------------|----------------------|---------|--------|
| Glial cell line-derived neurotrophic factor                  | HGDNF                | INF     | P39905 |
| Hepatocyte growth factor                                     | HGF                  | INF     | P14210 |
| Heme oxygenase 1                                             | HO1                  | CVD II  | P09601 |
| Osteoclast-associated immunoglobulin-like receptor           | HOSCAR               | CVD II  | Q8IYS5 |
| Heat shock 27 kDa protein                                    | HSP27                | CVD II  | P04792 |
| Intercellular adhesion molecule 2                            | ICAM2                | CVD III | P13598 |
| Alpha-L-iduronidase                                          | IDUA                 | CVD II  | P35475 |
| Insulin-like growth factor-binding protein 1                 | IGFBP1               | CVD III | P08833 |
| Insulin-like Growth Factor-Binding Protein 2                 | IGFBP2               | CVD III | P18065 |
| Insulin-like growth factor-binding protein 7                 | IGFBP7               | CVD III | Q16270 |
| Low affinity immunoglobulin gamma Fc region receptor II-b    | IGGFCRECEP<br>TORIIB | CVD II  | P31994 |
| Interleukin-10                                               | IL10                 | INF     | P22301 |
| Interleukin-10 receptor subunit alpha                        | IL10RA               | INF     | Q13651 |
| Interleukin-10 receptor subunit beta                         | IL10RB               | INF     | Q08334 |
| Interleukin-12 subunit beta                                  | IL12B                | INF     | P29460 |
| Interleukin-13                                               | IL13                 | INF     | P35225 |
| Interleukin-15 receptor subunit alpha                        | IL15RA               | INF     | Q13261 |
| Pro-interleukin-16                                           | IL16                 | CVD II  | Q14005 |
| Interleukin-17A                                              | IL17A                | INF     | Q16552 |
| Interleukin-17C                                              | IL17C                | INF     | Q9P0M4 |
| Interleukin-17D                                              | IL17D                | CVD II  | Q8TAD2 |
| Interleukin-17 receptor A                                    | IL17RA               | CVD III | Q96F46 |
| Interleukin-18 (CVD2)                                        | IL18                 | CVD II  | Q14116 |
| Interleukin-18-binding protein                               | IL18BP               | CVD III | O95998 |
| Interleukin-18 receptor 1                                    | IL18R1               | INF     | Q13478 |
| Interleukin-1 receptor antagonist protein                    | IL1RA                | CVD II  | P18510 |
| Interleukin-1 receptor-like 2                                | IL1RL2               | CVD II  | Q9HB29 |
| Interleukin-1 receptor type 1                                | IL1RT1               | CVD III | P14778 |
| Interleukin-1 receptor type 2                                | IL1RT2               | CVD III | P27930 |
| Interleukin-20 receptor subunit alpha                        | IL20RA               | INF     | Q9UHF4 |
| Interleukin-27                                               | IL27                 | CVD II  | Q8NEV9 |
| Interleukin-2 receptor subunit alpha                         | IL2RA                | CVD III | P01589 |
| Interleukin-4 receptor subunit alpha                         | IL4RA                | CVD II  | P24394 |
| Interleukin-6 (CVD2)                                         | IL6                  | CVD II  | P05231 |
| Interleukin-6 receptor subunit alpha                         | IL6RA                | CVD III | P08887 |
| Interleukin-7                                                | IL7                  | INF     | P13232 |
| Interleukin-8                                                | IL8                  | INF     | P10145 |
| Melusin                                                      | ITGB1BP2             | CVD II  | Q9UKP3 |
| Integrin beta-2                                              | ITGB2                | CVD III | P05107 |
| Junctional adhesion molecule A                               | JAMA                 | CVD III | Q9Y624 |
| Kidney injury molecule 1                                     | KIM1                 | CVD II  | Q96D42 |
| Kallikrein-6                                                 | KLK6                 | CVD III | Q92876 |
| Latency-associated peptide transforming growth factor beta 1 | LAPTGF BETA<br>1     | INF     | P01137 |
| Low-density lipoprotein receptor                             | LDLRECEPTO<br>R      | CVD III | P01130 |
| Leptin                                                       | LEP                  | CVD II  | P41159 |
| Leukemia inhibitory factor receptor                          | LIFR                 | INF     | P42702 |
| Lectin-like oxidized LDL receptor 1                          | LOX1                 | CVD II  | P78380 |
| Lipoprotein lipase                                           | LPL                  | CVD II  | P06858 |
| Lymphotoxin-beta receptor                                    | LTBR                 | CVD III | P36941 |
| Macrophage receptor MARCO                                    | MARCO                | CVD II  | Q9UEW3 |

|                                                  |                  |         |        |
|--------------------------------------------------|------------------|---------|--------|
| Myoglobin                                        | MB               | CVD III | P02144 |
| Monocyte chemotactic protein 1                   | MCP1_CVD3        | CVD III | P13500 |
| Monocyte chemotactic protein 2                   | MCP2             | INF     | P80075 |
| Monocyte chemotactic protein 3                   | MCP3             | INF     | P80098 |
| Monocyte chemotactic protein 4                   | MCP4             | INF     | Q99616 |
| Matrix extracellular phosphoglycoprotein         | MEPE             | CVD III | Q9NQ76 |
| Tyrosine-protein kinase Mer                      | MERTK            | CVD II  | Q12866 |
| Matrix metalloproteinase-1                       | MMP1             | INF     | P03956 |
| Matrix metalloproteinase-10                      | MMP10            | INF     | P09238 |
| Matrix metalloproteinase-12                      | MMP12            | CVD II  | P39900 |
| Matrix metalloproteinase-2                       | MMP2             | CVD III | P08253 |
| Matrix metalloproteinase-3                       | MMP3             | CVD III | P08254 |
| Matrix metalloproteinase-7                       | MMP7             | CVD II  | P09237 |
| Matrix metalloproteinase-9                       | MMP9             | CVD III | P14780 |
| Myeloperoxidase                                  | MPO              | CVD III | P05164 |
| NF-kappa-B essential modulator                   | NEMO             | CVD II  | Q9Y6K9 |
| Neurogenic locus notch homolog protein 3         | NOTCH3           | CVD III | Q9UM47 |
| Neurotrophin-3                                   | NT3              | INF     | P20783 |
| N-terminal prohormone brain natriuretic peptide  | NTPROBNP         | CVDII   | P16860 |
| Osteoprotegerin                                  | OPG_CVD3         | CVD III | O00300 |
| Osteopontin                                      | OPN              | CVD III | P10451 |
| Oncostatin-M                                     | OSM              | INF     | P13725 |
| Plasminogen activator inhibitor 1                | PAI              | CVD III | P05121 |
| Pappalysin-1                                     | PAPPA            | CVD II  | Q13219 |
| Proteinase-activated receptor 1                  | PAR1             | CVD II  | P25116 |
| Poly [ADP-ribose] polymerase 1                   | PARP1            | CVD II  | P09874 |
| Proprotein convertase subtilisin/kexin type 9    | PCSK9            | CVD III | Q8NBP7 |
| Platelet-derived growth factor subunit A         | PDGFSUBUNI<br>TA | CVD III | P04085 |
| Platelet-derived growth factor subunit B         | PDGFSUBUNI<br>TB | CVD II  | P01127 |
| Programmed cell death 1 ligand 1                 | PDL1             | INF     | Q9NZQ7 |
| Programmed cell death 1 ligand 2                 | PDL2             | CVD II  | Q9BQ51 |
| Platelet endothelial cell adhesion molecule      | PECAM1           | CVD III | P16284 |
| Peptidoglycan recognition protein 1              | PGLYRP1          | CVD III | O75594 |
| Elafin                                           | PI3              | CVD III | P19957 |
| Polymeric immunoglobulin receptor                | PIGR             | CVD II  | P01833 |
| Perlecan                                         | PLC              | CVD III | P98160 |
| Placenta growth factor                           | PLGF             | CVD II  | P49763 |
| Paraoxonase (PON 3)                              | PON3             | CVD III | Q15166 |
| Prolargin                                        | PRELP            | CVD II  | P51888 |
| Brother of CDO                                   | PROTEINBOC       | CVD II  | Q9BWV1 |
| Serine protease 27                               | PRSS27           | CVD II  | Q9BQR3 |
| Prostasin                                        | PRSS8            | CVD II  | Q16651 |
| Myeloblastin                                     | PRTN3            | CVD III | P24158 |
| P-selectin glycoprotein ligand 1                 | PSGL1            | CVD II  | Q14242 |
| Pulmonary surfactant-associated protein D        | PSPD             | CVD III | P35247 |
| Pentraxin-related protein PTX3                   | PTX3             | CVD II  | P26022 |
| Receptor for advanced glycosylation end products | RAGE             | CVD II  | Q15109 |
| Retinoic acid receptor responder protein 2       | RARRES2          | CVD III | Q99969 |
| Renin                                            | REN              | CVD II  | P00797 |
| Resistin                                         | RETN             | CVD III | Q9HD89 |
| Stem cell factor (CVD2)                          | SCF              | CVD II  | P21583 |

|                                                            |           |         |        |
|------------------------------------------------------------|-----------|---------|--------|
| Secretoglobin family 3A member 2                           | SCGB3A2   | CVD III | Q96PL1 |
| E-selectin                                                 | SELE      | CVD III | P16581 |
| P-selectin                                                 | SELP      | CVD III | P16109 |
| Serpin A12                                                 | SERPINA12 | CVD II  | Q8IW75 |
| Tyrosine-protein phosphatase non-receptor type substrate 1 | SHPS1     | CVD III | P78324 |
| SIR2-like protein 2                                        | SIRT2     | INF     | Q8IXJ6 |
| Signaling lymphocytic activation molecule                  | SLAMF1    | INF     | Q13291 |
| SLAM family member 7                                       | SLAMF7    | CVD II  | Q9NQ25 |
| Superoxide dismutase [Mn], mitochondrial                   | SOD2      | CVD II  | P04179 |
| Sortilin                                                   | SORT1     | CVD II  | Q99523 |
| Spondin-1                                                  | SPON1     | CVD III | Q9HCB6 |
| Spondin-2                                                  | SPON2     | CVD II  | Q9BUD6 |
| Proto-oncogene tyrosine-protein kinase Src                 | SRC       | CVD II  | P12931 |
| Sulfotransferase 1A1                                       | ST1A1     | INF     | P50225 |
| ST2 protein                                                | ST2       | CVD III | Q01638 |
| STAM-binding protein                                       | STAMPB    | INF     | O95630 |
| Serine/threonine-protein kinase 4                          | STK4      | CVD II  | Q13043 |
| Tissue factor                                              | TF        | CVD II  | P13726 |
| Trefoil factor 3                                           | TFF3      | CVD III | Q07654 |
| Tissue factor pathway inhibitor                            | TFPI      | CVD III | P10646 |
| Transforming growth factor alpha                           | TGFALPHA  | INF     | P01135 |
| Protein-glutamine gamma-glutamyltransferase 2              | TGM2      | CVD II  | P21980 |
| Thrombospondin-2                                           | THBS2     | CVD II  | P35442 |
| Thrombopoietin                                             | THPO      | CVD II  | P40225 |
| Angiopoietin-1 receptor                                    | TIE2      | CVD II  | Q02763 |
| Metalloproteinase inhibitor 4                              | TIMP4     | CVD III | Q99727 |
| Trem-like transcript 2 protein                             | TLT2      | CVD III | Q5T2D2 |
| Thrombomodulin                                             | TM        | CVD II  | P07204 |
| Tumor necrosis factor                                      | TNF       | INF     | P01375 |
| TNF-beta                                                   | TNFB      | INF     | P01374 |
| Tumor necrosis factor receptor 1                           | TNFR1     | CVD III | P19438 |
| Tumor necrosis factor receptor 2                           | TNFR2     | CVD III | P20333 |
| Tumor necrosis factor receptor superfamily member 10A      | TNFRSF10A | CVD II  | O00220 |
| Tumor necrosis factor receptor superfamily member 10C      | TNFRSF10C | CVD III | O14798 |
| Tumor necrosis factor receptor superfamily member 11A      | TNFRSF11A | CVD II  | Q9Y6Q6 |
| Tumor necrosis factor receptor superfamily member 13B      | TNFRSF13B | CVD II  | O14836 |
| Tumor necrosis factor receptor superfamily member 14       | TNFRSF14  | CVD III | Q92956 |
| Tumor necrosis factor receptor superfamily member 9        | TNFRSF9   | INF     | Q07011 |
| Tumor necrosis factor ligand superfamily member 13B        | TNFSF13B  | CVD III | Q9Y275 |
| Tumor necrosis factor ligand superfamily member 14         | TNFSF14   | INF     | O43557 |
| Tissue-type plasminogen activator                          | TPA       | CVD III | P00750 |
| Transferrin receptor protein 1                             | TR        | CVD III | P02786 |
| TNF-related apoptosis-inducing ligand                      | TRAIL     | INF     | P50591 |
| TNF-related apoptosis-inducing ligand receptor 2           | TRAILR2   | CVD II  | O14763 |
| TNF-related activation-induced cytokine                    | TRANCE    | INF     | O14788 |
| Tartrate-resistant acid phosphatase type 5                 | TRAP      | CVD III | P13686 |
| Tumor necrosis factor (Ligand) superfamily, member 12      | TWEAK     | INF     | O43508 |
| Urokinase-type plasminogen activator                       | UPA_CVD3  | CVD III | P00749 |
| Urokinase plasminogen activator surface receptor           | UPAR      | CVD III | Q03405 |
| Vascular endothelial growth factor A                       | VEGFA     | INF     | P15692 |
| Vascular endothelial growth factor D                       | VEGFD     | CVD II  | O43915 |

|                                                      |       |         |        |
|------------------------------------------------------|-------|---------|--------|
| V-set and immunoglobulin domain-containing protein 2 | VSIG2 | CVD II  | Q96IQ7 |
| von Willebrand factor                                | VWF   | CVD III | P04275 |
| Lymphotactin                                         | XCL1  | CVD II  | P47992 |

Legend: \*CVII: cardiovascular II; CVIII: cardiovascular III; INF: inflammation panels; \*\*UniProt ID from UniProt Knowledgebase

Supplemental Table 2. Study proteins order by p-value (from lowest to highest in the discovery set) in both discovery and replication phases

| Protein name | Discovery (phase 1a)            |              |         |     |                                                  |              |         |     | Replication (phase 1b)          |              |         |     |                                                  |              |         |     |
|--------------|---------------------------------|--------------|---------|-----|--------------------------------------------------|--------------|---------|-----|---------------------------------|--------------|---------|-----|--------------------------------------------------|--------------|---------|-----|
|              | Adjusted for matching variables |              |         |     | Adjusted for matching variables and risk factors |              |         |     | Adjusted for matching variables |              |         |     | Adjusted for matching variables and risk factors |              |         |     |
|              | OR                              | (95% CI)     | P-value | Z   | OR                                               | (95% CI)     | P-value | Z   | OR                              | (95% CI)     | P-value | Z   | OR                                               | (95% CI)     | P-value | Z   |
| NTPROBNP     | 1.74                            | (1.46, 2.06) | <0.0001 | 6.3 | 1.79                                             | (1.49, 2.14) | <0.0001 | 6.3 | 2                               | (1.64, 2.44) | <0.0001 | 6.9 | 2.06                                             | (1.66, 2.54) | <0.0001 | 6.6 |
| BNP          | 1.62                            | (1.42, 1.86) | <0.0001 | 7   | 1.59                                             | (1.37, 1.84) | <0.0001 | 6.3 | 1.73                            | (1.50, 2.01) | <0.0001 | 7.3 | 1.77                                             | (1.51, 2.07) | <0.0001 | 7.1 |
| GDF15        | 2.74                            | (2.08, 3.61) | <0.0001 | 7.2 | 2.34                                             | (1.72, 3.19) | <0.0001 | 5.4 | 1.89                            | (1.44, 2.47) | <0.0001 | 4.6 | 1.55                                             | (1.15, 2.09) | 0.0036  | 2.9 |
| TRAILR2      | 3.26                            | (2.32, 4.60) | <0.0001 | 6.8 | 2.7                                              | (1.86, 3.92) | <0.0001 | 5.2 | 3.22                            | (2.21, 4.69) | <0.0001 | 6.1 | 2.65                                             | (1.72, 4.07) | <0.0001 | 4.4 |
| CSTB         | 2.1                             | (1.67, 2.66) | <0.0001 | 6.2 | 1.84                                             | (1.43, 2.37) | <0.0001 | 4.8 | 1.3                             | (1.07, 1.60) | 0.0101  | 2.6 | 1.16                                             | (0.93, 1.44) | 0.1808  | 1.3 |
| UPAR         | 2.7                             | (1.94, 3.75) | <0.0001 | 5.9 | 2.27                                             | (1.61, 3.21) | <0.0001 | 4.6 | 1.67                            | (1.23, 2.28) | 0.0011  | 3.3 | 1.38                                             | (1.00, 1.92) | 0.0519  | 1.9 |
| VEGFA        | 2.65                            | (1.91, 3.67) | <0.0001 | 5.9 | 2.27                                             | (1.59, 3.22) | <0.0001 | 4.5 | 1.52                            | (1.09, 2.11) | 0.0129  | 2.5 | 1.27                                             | (0.89, 1.80) | 0.1837  | 1.3 |
| HGF          | 2.49                            | (1.78, 3.48) | <0.0001 | 5.3 | 2.12                                             | (1.50, 3.01) | <0.0001 | 4.2 | 1.5                             | (1.11, 2.02) | 0.0077  | 2.7 | 1.29                                             | (0.94, 1.77) | 0.119   | 1.6 |
| CXCL9        | 1.56                            | (1.30, 1.87) | <0.0001 | 4.7 | 1.52                                             | (1.25, 1.84) | <0.0001 | 4.2 | 1.09                            | (0.89, 1.34) | 0.3813  | 0.9 | 1.03                                             | (0.83, 1.28) | 0.7895  | 0.3 |
| IL6          | 1.51                            | (1.29, 1.78) | <0.0001 | 5.1 | 1.42                                             | (1.20, 1.68) | <0.0001 | 4.1 | 1.21                            | (1.03, 1.43) | 0.021   | 2.3 | 1.09                                             | (0.92, 1.30) | 0.3325  | 1   |
| OPN          | 2                               | (1.52, 2.63) | <0.0001 | 5   | 1.81                                             | (1.36, 2.41) | <0.0001 | 4.1 | 1.5                             | (1.16, 1.95) | 0.0021  | 3.1 | 1.36                                             | (1.03, 1.79) | 0.0298  | 2.2 |
| ADM          | 2.56                            | (1.82, 3.59) | <0.0001 | 5.4 | 2.12                                             | (1.48, 3.05) | <0.0001 | 4.1 | 1.8                             | (1.32, 2.45) | 0.0002  | 3.7 | 1.41                                             | (1.02, 1.96) | 0.0389  | 2.1 |
| CD40         | 2.26                            | (1.68, 3.04) | <0.0001 | 5.4 | 1.93                                             | (1.41, 2.66) | <0.0001 | 4.1 | 1.27                            | (0.94, 1.72) | 0.1228  | 1.5 | 1.05                                             | (0.76, 1.46) | 0.7743  | 0.3 |
| MCP3         | 1.7                             | (1.35, 2.15) | <0.0001 | 4.5 | 1.61                                             | (1.27, 2.05) | <0.0001 | 3.9 | 1.18                            | (0.89, 1.55) | 0.2444  | 1.2 | 1.08                                             | (0.81, 1.44) | 0.6164  | 0.5 |
| TFE3         | 1.61                            | (1.32, 1.95) | <0.0001 | 4.8 | 1.52                                             | (1.23, 1.87) | 0.0001  | 3.9 | 1.45                            | (1.15, 1.84) | 0.0019  | 3.1 | 1.25                                             | (0.96, 1.62) | 0.0924  | 1.7 |
| FABP4        | 1.82                            | (1.51, 2.19) | <0.0001 | 6.2 | 1.57                                             | (1.25, 1.97) | 0.0001  | 3.9 | 1.57                            | (1.29, 1.92) | <0.0001 | 4.5 | 1.28                                             | (1.01, 1.61) | 0.0383  | 2.1 |
| OPG_CVD3     | 2.31                            | (1.63, 3.27) | <0.0001 | 4.7 | 2.05                                             | (1.42, 2.95) | 0.0001  | 3.9 | 1.45                            | (1.02, 2.06) | 0.0385  | 2.1 | 1.25                                             | (0.86, 1.82) | 0.2381  | 1.2 |
| CXCL11       | 1.34                            | (1.17, 1.55) | <0.0001 | 4.1 | 1.33                                             | (1.15, 1.54) | 0.0001  | 3.8 | 1.11                            | (0.96, 1.29) | 0.1425  | 1.5 | 1.13                                             | (0.96, 1.32) | 0.1375  | 1.5 |
| TNFRSF10A    | 2.63                            | (1.88, 3.69) | <0.0001 | 5.6 | 2.01                                             | (1.40, 2.88) | 0.0002  | 3.8 | 2.56                            | (1.74, 3.77) | <0.0001 | 4.8 | 1.98                                             | (1.31, 3.01) | 0.0013  | 3.2 |
| TNFR1        | 2.4                             | (1.75, 3.28) | <0.0001 | 5.5 | 1.98                                             | (1.38, 2.84) | 0.0002  | 3.7 | 1.63                            | (1.23, 2.16) | 0.0007  | 3.4 | 1.26                                             | (0.92, 1.73) | 0.1488  | 1.4 |
| SPON1        | 2.25                            | (1.55, 3.26) | <0.0001 | 4.3 | 2.05                                             | (1.40, 2.98) | 0.0002  | 3.7 | 1.76                            | (1.16, 2.67) | 0.0083  | 2.6 | 1.42                                             | (0.91, 2.21) | 0.1225  | 1.5 |
| GAL9         | 2.96                            | (1.95, 4.49) | <0.0001 | 5.1 | 2.3                                              | (1.48, 3.58) | 0.0002  | 3.7 | 3.14                            | (2.01, 4.91) | <0.0001 | 5   | 2.59                                             | (1.61, 4.19) | <0.0001 | 3.9 |
| FGF23        | 1.7                             | (1.40, 2.07) | <0.0001 | 5.3 | 1.48                                             | (1.20, 1.81) | 0.0002  | 3.7 | 1.84                            | (1.44, 2.36) | <0.0001 | 4.8 | 1.69                                             | (1.30, 2.20) | <0.0001 | 3.9 |
| TNFRSF11A    | 2.09                            | (1.61, 2.72) | <0.0001 | 5.6 | 1.72                                             | (1.28, 2.31) | 0.0003  | 3.6 | 1.95                            | (1.47, 2.59) | <0.0001 | 4.6 | 1.53                                             | (1.12, 2.11) | 0.0085  | 2.6 |
| IL2RA        | 1.74                            | (1.33, 2.28) | <0.0001 | 4.1 | 1.66                                             | (1.25, 2.22) | 0.0005  | 3.5 | 1.42                            | (1.09, 1.84) | 0.0092  | 2.6 | 1.26                                             | (0.94, 1.67) | 0.1163  | 1.6 |
| TNFR2        | 2.11                            | (1.58, 2.82) | <0.0001 | 5.1 | 1.75                                             | (1.27, 2.42) | 0.0007  | 3.4 | 1.55                            | (1.20, 2.00) | 0.0008  | 3.3 | 1.29                                             | (0.98, 1.71) | 0.0743  | 1.8 |
| RETN         | 1.82                            | (1.42, 2.33) | <0.0001 | 4.7 | 1.58                                             | (1.21, 2.06) | 0.0008  | 3.3 | 1.37                            | (1.05, 1.77) | 0.0182  | 2.4 | 1.22                                             | (0.92, 1.62) | 0.1584  | 1.4 |
| TNFRSF13B    | 1.74                            | (1.34, 2.24) | <0.0001 | 4.2 | 1.58                                             | (1.21, 2.06) | 0.0008  | 3.3 | 2.61                            | (1.82, 3.74) | <0.0001 | 5.2 | 2.33                                             | (1.58, 3.44) | <0.0001 | 4.3 |
| AGRP         | 1.82                            | (1.38, 2.40) | <0.0001 | 4.2 | 1.64                                             | (1.23, 2.20) | 0.0009  | 3.3 | 1.9                             | (1.31, 2.76) | 0.0007  | 3.4 | 1.62                                             | (1.08, 2.44) | 0.0193  | 2.3 |
| TNFRSF14     | 2.09                            | (1.55, 2.82) | <0.0001 | 4.9 | 1.76                                             | (1.26, 2.46) | 0.0009  | 3.3 | 1.52                            | (1.15, 2.01) | 0.0034  | 2.9 | 1.26                                             | (0.93, 1.71) | 0.1394  | 1.5 |
| GAL4         | 1.89                            | (1.47, 2.42) | <0.0001 | 5   | 1.57                                             | (1.19, 2.05) | 0.0012  | 3.2 | 1.44                            | (1.10, 1.87) | 0.0071  | 2.7 | 1.18                                             | (0.89, 1.57) | 0.2553  | 1.1 |
| RARRES2      | 3.33                            | (2.02, 5.51) | <0.0001 | 4.7 | 2.45                                             | (1.42, 4.23) | 0.0014  | 3.2 | 2.05                            | (1.38, 3.05) | 0.0004  | 3.5 | 1.67                                             | (1.09, 2.56) | 0.0183  | 2.4 |
| ACE2         | 1.6                             | (1.27, 2.02) | <0.0001 | 4   | 1.48                                             | (1.16, 1.89) | 0.0014  | 3.2 | 1.52                            | (1.17, 1.98) | 0.0016  | 3.2 | 1.4                                              | (1.06, 1.84) | 0.0173  | 2.4 |
| PLGF         | 2.17                            | (1.54, 3.06) | <0.0001 | 4.4 | 1.86                                             | (1.27, 2.72) | 0.0014  | 3.2 | 1.95                            | (1.38, 2.75) | 0.0002  | 3.8 | 1.61                                             | (1.11, 2.34) | 0.0131  | 2.5 |
| PGLYRP1      | 1.68                            | (1.31, 2.15) | <0.0001 | 4.1 | 1.53                                             | (1.17, 1.98) | 0.0016  | 3.2 | 1.36                            | (1.06, 1.74) | 0.0151  | 2.4 | 1.2                                              | (0.92, 1.56) | 0.1893  | 1.3 |
| TGFALPHA     | 1.9                             | (1.40, 2.59) | <0.0001 | 4.1 | 1.66                                             | (1.21, 2.28) | 0.0016  | 3.2 | 1.38                            | (1.07, 1.78) | 0.0122  | 2.5 | 1.23                                             | (0.94, 1.61) | 0.1345  | 1.5 |
| MMP12        | 1.64                            | (1.32, 2.03) | <0.0001 | 4.6 | 1.42                                             | (1.13, 1.79) | 0.0023  | 3   | 1.54                            | (1.23, 1.92) | 0.0002  | 3.8 | 1.33                                             | (1.04, 1.70) | 0.0236  | 2.3 |
| TIMP4        | 1.72                            | (1.32, 2.23) | <0.0001 | 4   | 1.54                                             | (1.17, 2.04) | 0.0024  | 3   | 1.2                             | (0.93, 1.53) | 0.1568  | 1.4 | 1.08                                             | (0.83, 1.41) | 0.5465  | 0.6 |
| SLAMF7       | 1.55                            | (1.26, 1.91) | <0.0001 | 4.1 | 1.41                                             | (1.13, 1.76) | 0.0024  | 3   | 2.16                            | (1.52, 3.06) | <0.0001 | 4.3 | 2                                                | (1.38, 2.91) | 0.0003  | 3.7 |
| TNFRSF9      | 1.54                            | (1.25, 1.90) | <0.0001 | 4   | 1.41                                             | (1.13, 1.76) | 0.0025  | 3   | 1.33                            | (1.03, 1.72) | 0.0318  | 2.1 | 1.15                                             | (0.86, 1.53) | 0.3411  | 1   |
| IL1RA        | 1.54                            | (1.27, 1.86) | <0.0001 | 4.4 | 1.37                                             | (1.11, 1.69) | 0.003   | 3   | 1.25                            | (1.07, 1.46) | 0.0048  | 2.8 | 1.17                                             | (0.99, 1.39) | 0.059   | 1.9 |
| CCL16        | 1.47                            | (1.21, 1.79) | <0.0001 | 3.9 | 1.37                                             | (1.11, 1.68) | 0.003   | 3   | 1.72                            | (1.34, 2.22) | <0.0001 | 4.2 | 1.55                                             | (1.18, 2.02) | 0.0015  | 3.2 |
| CD4          | 2.06                            | (1.49, 2.85) | <0.0001 | 4.3 | 1.67                                             | (1.18, 2.35) | 0.0035  | 2.9 | 2.17                            | (1.49, 3.16) | <0.0001 | 4   | 1.86                                             | (1.25, 2.77) | 0.0021  | 3.1 |



|             |      |              |         |     |      |              |         |     |      |              |         |     |      |              |        |     |
|-------------|------|--------------|---------|-----|------|--------------|---------|-----|------|--------------|---------|-----|------|--------------|--------|-----|
| LTBR        | 1.93 | (1.40, 2.68) | <0.0001 | 4   | 1.7  | (1.18, 2.45) | 0.004   | 2.9 | 1.42 | (1.06, 1.90) | 0.0203  | 2.3 | 1.22 | (0.88, 1.68) | 0.2287 | 1.2 |
| IL15RA      | 2.12 | (1.47, 3.05) | <0.0001 | 4   | 1.74 | (1.18, 2.56) | 0.0053  | 2.8 | 1.75 | (1.07, 2.85) | 0.0258  | 2.2 | 1.46 | (0.86, 2.49) | 0.1579 | 1.4 |
| KIM1        | 1.41 | (1.19, 1.68) | <0.0001 | 4   | 1.29 | (1.07, 1.55) | 0.0065  | 2.7 | 1.51 | (1.23, 1.84) | <0.0001 | 4   | 1.31 | (1.05, 1.62) | 0.0159 | 2.4 |
| PLC         | 2.26 | (1.59, 3.21) | <0.0001 | 4.5 | 1.77 | (1.17, 2.68) | 0.0071  | 2.7 | 1.76 | (1.24, 2.49) | 0.0015  | 3.2 | 1.43 | (0.97, 2.11) | 0.0686 | 1.8 |
| CEACAM8     | 1.51 | (1.22, 1.86) | 0.0001  | 3.8 | 1.47 | (1.18, 1.83) | 0.0006  | 3.4 | 1.49 | (1.19, 1.86) | 0.0005  | 3.5 | 1.36 | (1.08, 1.73) | 0.0098 | 2.6 |
| ICAM2       | 1.91 | (1.37, 2.66) | 0.0001  | 3.8 | 1.73 | (1.22, 2.44) | 0.0019  | 3.1 | 1.16 | (0.86, 1.57) | 0.3262  | 1   | 1.06 | (0.77, 1.45) | 0.7229 | 0.4 |
| EPHB4       | 1.96 | (1.40, 2.76) | 0.0001  | 3.9 | 1.62 | (1.11, 2.37) | 0.0121  | 2.5 | 1.38 | (1.00, 1.91) | 0.0499  | 2   | 1.19 | (0.84, 1.69) | 0.3334 | 1   |
| HSP27       | 2.13 | (1.42, 3.22) | 0.0003  | 3.6 | 2.03 | (1.32, 3.14) | 0.0013  | 3.2 | 1.32 | (1.02, 1.71) | 0.0357  | 2.1 | 1.27 | (0.97, 1.68) | 0.0826 | 1.7 |
| LAPTFGBETA1 | 1.68 | (1.27, 2.22) | 0.0003  | 3.6 | 1.58 | (1.18, 2.12) | 0.0021  | 3.1 | 1.15 | (0.88, 1.49) | 0.3102  | 1   | 1.11 | (0.84, 1.47) | 0.4747 | 0.7 |
| PAR1        | 1.86 | (1.33, 2.60) | 0.0003  | 3.6 | 1.64 | (1.16, 2.31) | 0.0048  | 2.8 | 1.74 | (1.24, 2.45) | 0.0014  | 3.2 | 1.53 | (1.07, 2.19) | 0.0186 | 2.4 |
| TWEAK       | 0.51 | (0.36, 0.73) | 0.0003  | 3.6 | 0.58 | (0.39, 0.85) | 0.0052  | 2.8 | 0.53 | (0.39, 0.71) | <0.0001 | 4.1 | 0.58 | (0.42, 0.80) | 0.0008 | 3.4 |
| CXCL16      | 1.95 | (1.36, 2.79) | 0.0003  | 3.6 | 1.66 | (1.13, 2.46) | 0.0101  | 2.6 | 1.29 | (0.93, 1.81) | 0.1317  | 1.5 | 1.12 | (0.78, 1.60) | 0.5478 | 0.6 |
| JAMA        | 1.43 | (1.18, 1.73) | 0.0003  | 3.6 | 1.29 | (1.06, 1.58) | 0.0122  | 2.5 | 1.11 | (0.94, 1.32) | 0.2257  | 1.2 | 1.07 | (0.90, 1.28) | 0.4462 | 0.8 |
| IL18BP      | 1.71 | (1.28, 2.29) | 0.0003  | 3.6 | 1.5  | (1.09, 2.07) | 0.013   | 2.5 | 1.39 | (1.06, 1.83) | 0.0192  | 2.3 | 1.18 | (0.87, 1.59) | 0.2842 | 1.1 |
| CCL15       | 1.51 | (1.21, 1.88) | 0.0003  | 3.6 | 1.29 | (1.00, 1.65) | 0.0463  | 2   | 1.39 | (1.08, 1.79) | 0.0117  | 2.5 | 1.18 | (0.89, 1.57) | 0.238  | 1.2 |
| CHI3L1      | 1.33 | (1.14, 1.56) | 0.0004  | 3.5 | 1.25 | (1.06, 1.47) | 0.0086  | 2.6 | 1.2  | (1.01, 1.42) | 0.0352  | 2.1 | 1.08 | (0.90, 1.29) | 0.4317 | 0.8 |
| CSF1        | 2.27 | (1.43, 3.61) | 0.0005  | 3.5 | 1.91 | (1.18, 3.09) | 0.0088  | 2.6 | 1.37 | (0.78, 2.42) | 0.2774  | 1.1 | 1.05 | (0.57, 1.93) | 0.8707 | 0.2 |
| PDL1        | 1.64 | (1.24, 2.16) | 0.0005  | 3.5 | 1.47 | (1.09, 1.98) | 0.0107  | 2.6 | 1.3  | (0.93, 1.81) | 0.1215  | 1.5 | 0.96 | (0.67, 1.39) | 0.8473 | 0.2 |
| PDL2        | 1.96 | (1.34, 2.87) | 0.0005  | 3.5 | 1.68 | (1.13, 2.50) | 0.011   | 2.5 | 1.77 | (1.18, 2.65) | 0.006   | 2.7 | 1.62 | (1.05, 2.50) | 0.0287 | 2.2 |
| FAS         | 1.78 | (1.29, 2.46) | 0.0005  | 3.5 | 1.49 | (1.06, 2.09) | 0.0223  | 2.3 | 1.52 | (1.10, 2.11) | 0.012   | 2.5 | 1.29 | (0.90, 1.84) | 0.1601 | 1.4 |
| GRN         | 2.09 | (1.38, 3.16) | 0.0005  | 3.5 | 1.66 | (1.07, 2.57) | 0.0239  | 2.3 | 1.41 | (0.96, 2.08) | 0.0811  | 1.7 | 1.16 | (0.76, 1.75) | 0.4918 | 0.7 |
| SLAMF1      | 1.44 | (1.17, 1.76) | 0.0005  | 3.5 | 1.27 | (1.02, 1.58) | 0.0293  | 2.2 | 1.62 | (1.23, 2.13) | 0.0005  | 3.5 | 1.42 | (1.06, 1.89) | 0.0175 | 2.4 |
| CTSZ        | 1.74 | (1.27, 2.39) | 0.0005  | 3.5 | 1.44 | (1.03, 2.02) | 0.0321  | 2.1 | 1.32 | (0.97, 1.78) | 0.0748  | 1.8 | 1.09 | (0.79, 1.52) | 0.5884 | 0.5 |
| IGFBP7      | 1.66 | (1.24, 2.23) | 0.0006  | 3.4 | 1.42 | (1.04, 1.94) | 0.0259  | 2.2 | 1.6  | (1.21, 2.11) | 0.001   | 3.3 | 1.42 | (1.05, 1.91) | 0.021  | 2.3 |
| IL16        | 1.54 | (1.20, 1.97) | 0.0007  | 3.4 | 1.38 | (1.06, 1.79) | 0.016   | 2.4 | 1.46 | (1.15, 1.86) | 0.0019  | 3.1 | 1.34 | (1.04, 1.72) | 0.0232 | 2.3 |
| CCL25       | 1.51 | (1.18, 1.94) | 0.0009  | 3.3 | 1.35 | (1.04, 1.75) | 0.0234  | 2.3 | 0.96 | (0.72, 1.29) | 0.8091  | 0.2 | 0.85 | (0.62, 1.17) | 0.3243 | 1   |
| IL12B       | 1.4  | (1.14, 1.72) | 0.0011  | 3.3 | 1.3  | (1.05, 1.62) | 0.0173  | 2.4 | 1.25 | (1.00, 1.56) | 0.0476  | 2   | 1.12 | (0.88, 1.43) | 0.3453 | 0.9 |
| PON3        | 0.71 | (0.58, 0.87) | 0.0011  | 3.3 | 0.83 | (0.66, 1.04) | 0.0977  | 1.7 | 0.64 | (0.51, 0.80) | <0.0001 | 3.9 | 0.72 | (0.56, 0.91) | 0.0064 | 2.7 |
| IGFBP1      | 1.26 | (1.09, 1.45) | 0.0013  | 3.2 | 1.41 | (1.19, 1.66) | <0.0001 | 4.1 | 1.08 | (0.92, 1.26) | 0.3564  | 0.9 | 1.14 | (0.95, 1.37) | 0.153  | 1.4 |
| CCL23       | 1.6  | (1.20, 2.14) | 0.0014  | 3.2 | 1.74 | (1.28, 2.37) | 0.0005  | 3.5 | 1.08 | (0.79, 1.47) | 0.6256  | 0.5 | 0.98 | (0.70, 1.37) | 0.9144 | 0.1 |
| DECR1       | 1.19 | (1.07, 1.33) | 0.0014  | 3.2 | 1.17 | (1.04, 1.31) | 0.0085  | 2.6 | 1.03 | (0.93, 1.15) | 0.5695  | 0.6 | 1.02 | (0.91, 1.15) | 0.7041 | 0.4 |
| SPON2       | 2.86 | (1.50, 5.48) | 0.0015  | 3.2 | 2.66 | (1.36, 5.21) | 0.0044  | 2.8 | 2.4  | (1.36, 4.25) | 0.0026  | 3   | 2.1  | (1.16, 3.79) | 0.0137 | 2.5 |
| TM          | 1.9  | (1.27, 2.82) | 0.0016  | 3.2 | 1.63 | (1.07, 2.48) | 0.0233  | 2.3 | 1.5  | (1.03, 2.19) | 0.0354  | 2.1 | 1.24 | (0.85, 1.82) | 0.2637 | 1.1 |
| REN         | 1.31 | (1.11, 1.55) | 0.0018  | 3.1 | 1.18 | (0.98, 1.41) | 0.0772  | 1.8 | 1.54 | (1.29, 1.85) | <0.0001 | 4.7 | 1.38 | (1.13, 1.68) | 0.0014 | 3.2 |
| MMP3        | 1.4  | (1.13, 1.74) | 0.0021  | 3.1 | 1.37 | (1.09, 1.73) | 0.0062  | 2.7 | 1.17 | (0.94, 1.45) | 0.1521  | 1.4 | 1.05 | (0.83, 1.33) | 0.673  | 0.4 |
| CASP8       | 1.26 | (1.09, 1.47) | 0.0021  | 3.1 | 1.22 | (1.04, 1.43) | 0.0126  | 2.5 | 1.19 | (1.03, 1.37) | 0.0148  | 2.4 | 1.18 | (1.02, 1.37) | 0.0286 | 2.2 |
| TLT2        | 1.49 | (1.16, 1.93) | 0.0021  | 3.1 | 1.39 | (1.06, 1.82) | 0.0169  | 2.4 | 1.06 | (0.80, 1.40) | 0.6846  | 0.4 | 0.98 | (0.73, 1.32) | 0.9002 | 0.1 |
| MMP2        | 1.64 | (1.19, 2.24) | 0.0023  | 3   | 1.55 | (1.11, 2.16) | 0.0096  | 2.6 | 1.38 | (1.01, 1.88) | 0.0452  | 2   | 1.38 | (0.99, 1.91) | 0.0553 | 1.9 |
| IL10RB      | 1.77 | (1.22, 2.56) | 0.0024  | 3   | 1.56 | (1.06, 2.30) | 0.0247  | 2.2 | 1.27 | (0.83, 1.92) | 0.2708  | 1.1 | 0.92 | (0.58, 1.46) | 0.7309 | 0.3 |
| GAL3        | 1.52 | (1.16, 2.00) | 0.0025  | 3   | 1.44 | (1.08, 1.92) | 0.012   | 2.5 | 1.17 | (0.89, 1.54) | 0.2714  | 1.1 | 1.02 | (0.76, 1.37) | 0.887  | 0.1 |
| CD163       | 1.46 | (1.14, 1.87) | 0.0025  | 3   | 1.35 | (1.05, 1.75) | 0.0198  | 2.3 | 1.07 | (0.84, 1.35) | 0.581   | 0.6 | 0.99 | (0.77, 1.27) | 0.9236 | 0.1 |
| VSIG2       | 1.43 | (1.14, 1.81) | 0.0025  | 3   | 1.24 | (0.96, 1.59) | 0.0967  | 1.7 | 1.76 | (1.33, 2.32) | <0.0001 | 4   | 1.46 | (1.06, 2.01) | 0.02   | 2.3 |
| TR          | 1.37 | (1.12, 1.69) | 0.0028  | 3   | 1.29 | (1.04, 1.61) | 0.0202  | 2.3 | 1.24 | (0.99, 1.55) | 0.0663  | 1.8 | 1.12 | (0.88, 1.43) | 0.3645 | 0.9 |
| CCL20       | 1.21 | (1.07, 1.38) | 0.003   | 3   | 1.17 | (1.02, 1.33) | 0.0223  | 2.3 | 1.06 | (0.94, 1.21) | 0.3405  | 1   | 1.03 | (0.90, 1.18) | 0.6877 | 0.4 |
| NEMO        | 1.19 | (1.06, 1.34) | 0.0032  | 2.9 | 1.16 | (1.02, 1.31) | 0.0224  | 2.3 | 1.07 | (0.93, 1.23) | 0.3387  | 1   | 1.04 | (0.90, 1.21) | 0.5799 | 0.6 |
| IL4RA*      | 1.52 | (1.15, 2.02) | 0.0033  | 2.9 | 1.42 | (1.06, 1.90) | 0.0171  | 2.4 | 1.62 | (1.18, 2.22) | 0.0029  | 3   | 1.45 | (1.03, 2.03) | 0.0309 | 2.2 |
| MERTK       | 1.66 | (1.18, 2.33) | 0.0038  | 2.9 | 1.6  | (1.12, 2.28) | 0.0101  | 2.6 | 1.38 | (0.96, 1.99) | 0.0863  | 1.7 | 1.29 | (0.87, 1.91) | 0.2016 | 1.3 |
| IL17C       | 1.41 | (1.12, 1.77) | 0.0038  | 2.9 | 1.29 | (1.01, 1.65) | 0.0398  | 2.1 | 1.07 | (0.80, 1.44) | 0.6416  | 0.5 | 1.02 | (0.75, 1.39) | 0.8845 | 0.1 |

|           |      |              |        |     |      |              |        |     |      |              |         |     |      |              |         |     |
|-----------|------|--------------|--------|-----|------|--------------|--------|-----|------|--------------|---------|-----|------|--------------|---------|-----|
| CXCL10    | 1.28 | (1.08, 1.52) | 0.0042 | 2.9 | 1.26 | (1.05, 1.51) | 0.0116 | 2.5 | 1.05 | (0.88, 1.25) | 0.5963  | 0.5 | 1.08 | (0.89, 1.29) | 0.437   | 0.8 |
| ENRAGE    | 1.26 | (1.08, 1.47) | 0.0042 | 2.9 | 1.23 | (1.04, 1.46) | 0.0137 | 2.5 | 1.54 | (1.25, 1.90) | <0.0001 | 4   | 1.44 | (1.15, 1.81) | 0.0016  | 3.2 |
| BETANGF   | 1.66 | (1.16, 2.36) | 0.005  | 2.8 | 1.38 | (0.95, 2.00) | 0.0917 | 1.7 | 1.15 | (0.77, 1.72) | 0.4889  | 0.7 | 1.06 | (0.70, 1.62) | 0.7691  | 0.3 |
| LOX1      | 1.39 | (1.10, 1.76) | 0.0054 | 2.8 | 1.36 | (1.07, 1.74) | 0.0129 | 2.5 | 1.49 | (1.19, 1.86) | 0.0005  | 3.5 | 1.46 | (1.15, 1.86) | 0.0018  | 3.1 |
| MMP10     | 1.34 | (1.09, 1.66) | 0.0055 | 2.8 | 1.25 | (1.00, 1.55) | 0.0463 | 2   | 0.88 | (0.68, 1.14) | 0.3391  | 1   | 0.76 | (0.57, 1.00) | 0.0518  | 1.9 |
| PECAM1    | 1.51 | (1.13, 2.01) | 0.0058 | 2.8 | 1.41 | (1.04, 1.91) | 0.0267 | 2.2 | 1.05 | (0.81, 1.35) | 0.7106  | 0.4 | 1.06 | (0.81, 1.38) | 0.6884  | 0.4 |
| IL10      | 1.35 | (1.09, 1.67) | 0.0062 | 2.7 | 1.31 | (1.05, 1.63) | 0.0161 | 2.4 | 1.03 | (0.84, 1.27) | 0.7601  | 0.3 | 0.96 | (0.78, 1.20) | 0.742   | 0.3 |
| LIFR      | 1.68 | (1.16, 2.45) | 0.0067 | 2.7 | 1.44 | (0.97, 2.14) | 0.0679 | 1.8 | 1.15 | (0.75, 1.76) | 0.5178  | 0.6 | 0.94 | (0.60, 1.49) | 0.7975  | 0.3 |
| HOSCAR    | 2.11 | (1.23, 3.64) | 0.0069 | 2.7 | 1.93 | (1.09, 3.39) | 0.023  | 2.3 | 1.93 | (1.12, 3.32) | 0.0175  | 2.4 | 1.68 | (0.95, 2.97) | 0.0764  | 1.8 |
| IGFBP2    | 1.35 | (1.08, 1.68) | 0.0072 | 2.7 | 1.55 | (1.21, 1.99) | 0.0005 | 3.5 | 1.25 | (0.99, 1.58) | 0.0628  | 1.9 | 1.35 | (1.03, 1.77) | 0.0298  | 2.2 |
| CDCP1     | 1.34 | (1.08, 1.66) | 0.0074 | 2.7 | 1.26 | (1.01, 1.59) | 0.0431 | 2   | 0.98 | (0.76, 1.26) | 0.8736  | 0.2 | 0.85 | (0.65, 1.11) | 0.2395  | 1.2 |
| MCP2      | 1.36 | (1.09, 1.70) | 0.0075 | 2.7 | 1.35 | (1.07, 1.71) | 0.0127 | 2.5 | 1.13 | (0.91, 1.41) | 0.2737  | 1.1 | 1.11 | (0.88, 1.41) | 0.3724  | 0.9 |
| CX3CL1    | 1.48 | (1.11, 1.97) | 0.0075 | 2.7 | 1.3  | (0.96, 1.77) | 0.0926 | 1.7 | 1.18 | (0.87, 1.60) | 0.2787  | 1.1 | 1.01 | (0.72, 1.41) | 0.9603  | 0   |
| PRTN3     | 1.35 | (1.08, 1.68) | 0.0081 | 2.6 | 1.3  | (1.04, 1.64) | 0.0238 | 2.3 | 1.26 | (0.99, 1.59) | 0.0557  | 1.9 | 1.18 | (0.92, 1.51) | 0.1911  | 1.3 |
| AXIN1     | 1.16 | (1.04, 1.29) | 0.0085 | 2.6 | 1.13 | (1.01, 1.26) | 0.0403 | 2.1 | 0.96 | (0.84, 1.10) | 0.5615  | 0.6 | 0.94 | (0.81, 1.09) | 0.4114  | 0.8 |
| MPO       | 1.43 | (1.09, 1.86) | 0.009  | 2.6 | 1.36 | (1.03, 1.79) | 0.0323 | 2.1 | 1.17 | (0.90, 1.51) | 0.2337  | 1.2 | 1.09 | (0.83, 1.43) | 0.524   | 0.6 |
| GT        | 1.27 | (1.06, 1.53) | 0.0101 | 2.6 | 1.19 | (0.97, 1.44) | 0.088  | 1.7 | 1.3  | (1.02, 1.67) | 0.037   | 2.1 | 1.26 | (0.96, 1.65) | 0.092   | 1.7 |
| SORT1     | 1.93 | (1.17, 3.18) | 0.0103 | 2.6 | 1.99 | (1.17, 3.38) | 0.0107 | 2.6 | 1.68 | (1.08, 2.62) | 0.0218  | 2.3 | 1.8  | (1.12, 2.89) | 0.0149  | 2.4 |
| ST1A1     | 1.16 | (1.04, 1.31) | 0.0103 | 2.6 | 1.13 | (1.00, 1.27) | 0.0593 | 1.9 | 1.02 | (0.91, 1.15) | 0.7111  | 0.4 | 1.01 | (0.89, 1.15) | 0.8863  | 0.1 |
| CCL11     | 1.45 | (1.09, 1.93) | 0.0104 | 2.6 | 1.41 | (1.05, 1.91) | 0.0242 | 2.3 | 1.46 | (1.06, 1.99) | 0.019   | 2.3 | 1.36 | (0.97, 1.91) | 0.0734  | 1.8 |
| CST5      | 1.35 | (1.07, 1.70) | 0.0113 | 2.5 | 1.19 | (0.92, 1.54) | 0.1858 | 1.3 | 1.01 | (0.76, 1.35) | 0.9334  | 0.1 | 0.85 | (0.62, 1.18) | 0.3325  | 1   |
| SELP      | 1.33 | (1.07, 1.67) | 0.0121 | 2.5 | 1.26 | (1.00, 1.60) | 0.0529 | 1.9 | 1.12 | (0.91, 1.37) | 0.3031  | 1   | 1.11 | (0.89, 1.39) | 0.3584  | 0.9 |
| BP1_4E    | 1.17 | (1.04, 1.33) | 0.0121 | 2.5 | 1.14 | (1.00, 1.30) | 0.0541 | 1.9 | 1.17 | (1.02, 1.34) | 0.0254  | 2.2 | 1.12 | (0.97, 1.29) | 0.135   | 1.5 |
| SIRT2     | 1.13 | (1.03, 1.24) | 0.0131 | 2.5 | 1.11 | (1.00, 1.22) | 0.049  | 2   | 1.05 | (0.94, 1.17) | 0.3818  | 0.9 | 1.03 | (0.92, 1.15) | 0.6376  | 0.5 |
| ST2       | 1.37 | (1.07, 1.75) | 0.0131 | 2.5 | 1.25 | (0.97, 1.62) | 0.0861 | 1.7 | 1.42 | (1.09, 1.83) | 0.0083  | 2.6 | 1.33 | (1.01, 1.76) | 0.0395  | 2.1 |
| CASP3     | 1.15 | (1.03, 1.28) | 0.0133 | 2.5 | 1.12 | (1.00, 1.26) | 0.0486 | 2   | 1.04 | (0.93, 1.17) | 0.4996  | 0.7 | 1.02 | (0.90, 1.16) | 0.7465  | 0.3 |
| PRSS8     | 1.62 | (1.11, 2.38) | 0.0133 | 2.5 | 1.39 | (0.93, 2.07) | 0.1063 | 1.6 | 1.3  | (1.04, 1.63) | 0.0193  | 2.3 | 1.21 | (0.96, 1.53) | 0.1148  | 1.6 |
| VWF       | 1.18 | (1.04, 1.35) | 0.0135 | 2.5 | 1.15 | (1.00, 1.32) | 0.0539 | 1.9 | 1.18 | (1.03, 1.36) | 0.0153  | 2.4 | 1.17 | (1.01, 1.35) | 0.0347  | 2.1 |
| FGF21     | 1.15 | (1.03, 1.28) | 0.0139 | 2.5 | 1.08 | (0.96, 1.21) | 0.2096 | 1.3 | 1.15 | (1.03, 1.30) | 0.0161  | 2.4 | 1.07 | (0.95, 1.22) | 0.272   | 1.1 |
| TGM2      | 1.26 | (1.05, 1.51) | 0.0144 | 2.4 | 1.22 | (1.01, 1.48) | 0.0383 | 2.1 | 1.43 | (1.18, 1.73) | 0.0003  | 3.6 | 1.55 | (1.25, 1.91) | <0.0001 | 4   |
| IL1RT1    | 1.58 | (1.09, 2.28) | 0.0145 | 2.4 | 1.39 | (0.94, 2.06) | 0.0991 | 1.6 | 1.18 | (0.86, 1.62) | 0.3017  | 1   | 1.07 | (0.76, 1.49) | 0.704   | 0.4 |
| CD244     | 1.48 | (1.08, 2.04) | 0.0154 | 2.4 | 1.36 | (0.97, 1.90) | 0.0737 | 1.8 | 0.79 | (0.55, 1.12) | 0.1841  | 1.3 | 0.7  | (0.48, 1.02) | 0.0603  | 1.9 |
| MCP1_CVD3 | 1.27 | (1.05, 1.55) | 0.0162 | 2.4 | 1.23 | (1.02, 1.49) | 0.0308 | 2.2 | 1.14 | (0.91, 1.43) | 0.265   | 1.1 | 1.09 | (0.86, 1.38) | 0.4702  | 0.7 |
| CD93      | 1.6  | (1.09, 2.35) | 0.0163 | 2.4 | 1.38 | (0.91, 2.09) | 0.1272 | 1.5 | 1.62 | (1.12, 2.35) | 0.0107  | 2.6 | 1.44 | (0.96, 2.15) | 0.0793  | 1.8 |
| PCSK9     | 1.43 | (1.07, 1.93) | 0.0171 | 2.4 | 1.32 | (0.97, 1.79) | 0.0791 | 1.8 | 1    | (0.74, 1.36) | 0.982   | 0   | 0.91 | (0.66, 1.25) | 0.5486  | 0.6 |
| PI3       | 1.27 | (1.04, 1.54) | 0.0174 | 2.4 | 1.08 | (0.87, 1.35) | 0.4985 | 0.7 | 1.21 | (1.01, 1.45) | 0.0384  | 2.1 | 1.09 | (0.90, 1.32) | 0.3972  | 0.8 |
| IL6RA     | 1.5  | (1.07, 2.10) | 0.0192 | 2.3 | 1.58 | (1.10, 2.25) | 0.0126 | 2.5 | 1.21 | (0.89, 1.63) | 0.228   | 1.2 | 1.17 | (0.85, 1.61) | 0.3472  | 0.9 |
| VEGFD     | 1.52 | (1.07, 2.17) | 0.0205 | 2.3 | 1.75 | (1.19, 2.58) | 0.0045 | 2.8 | 1.81 | (1.29, 2.54) | 0.0007  | 3.4 | 1.98 | (1.36, 2.89) | 0.0004  | 3.6 |
| TNFSF14   | 1.28 | (1.04, 1.57) | 0.0212 | 2.3 | 1.22 | (0.98, 1.52) | 0.0795 | 1.8 | 1.14 | (0.94, 1.38) | 0.1775  | 1.3 | 1.17 | (0.96, 1.44) | 0.1236  | 1.5 |
| ITGB1BP2  | 1.11 | (1.02, 1.21) | 0.0213 | 2.3 | 1.09 | (0.99, 1.19) | 0.0842 | 1.7 | 1.03 | (0.93, 1.14) | 0.5949  | 0.5 | 1.01 | (0.90, 1.12) | 0.9105  | 0.1 |
| FABP2     | 1.27 | (1.03, 1.56) | 0.0223 | 2.3 | 1.2  | (0.97, 1.50) | 0.0998 | 1.6 | 1.32 | (1.06, 1.63) | 0.0119  | 2.5 | 1.19 | (0.95, 1.49) | 0.1356  | 1.5 |
| BLMH      | 1.44 | (1.05, 1.96) | 0.0224 | 2.3 | 1.5  | (1.08, 2.09) | 0.0154 | 2.4 | 0.79 | (0.58, 1.07) | 0.1287  | 1.5 | 0.83 | (0.60, 1.15) | 0.2558  | 1.1 |
| SRC       | 1.19 | (1.02, 1.38) | 0.0231 | 2.3 | 1.15 | (0.99, 1.35) | 0.0733 | 1.8 | 1.07 | (0.92, 1.26) | 0.3867  | 0.9 | 1.03 | (0.87, 1.21) | 0.7691  | 0.3 |
| IL8       | 1.2  | (1.03, 1.40) | 0.0232 | 2.3 | 1.18 | (1.00, 1.39) | 0.0508 | 2   | 1.13 | (0.94, 1.36) | 0.2025  | 1.3 | 1.1  | (0.90, 1.33) | 0.3563  | 0.9 |
| SELE      | 1.37 | (1.04, 1.79) | 0.0239 | 2.3 | 1.13 | (0.85, 1.51) | 0.409  | 0.8 | 1.31 | (0.99, 1.75) | 0.0624  | 1.9 | 1.18 | (0.87, 1.60) | 0.2917  | 1.1 |
| LEP       | 1.17 | (1.02, 1.35) | 0.0246 | 2.2 | 1.01 | (0.84, 1.21) | 0.9082 | 0.1 | 1.22 | (1.04, 1.43) | 0.0148  | 2.4 | 1.03 | (0.83, 1.28) | 0.7984  | 0.3 |
| PSPD      | 1.22 | (1.02, 1.46) | 0.0262 | 2.2 | 1.27 | (1.05, 1.54) | 0.0122 | 2.5 | 1.29 | (1.03, 1.61) | 0.0236  | 2.3 | 1.32 | (1.05, 1.67) | 0.0194  | 2.3 |
| IL18R1    | 1.42 | (1.04, 1.94) | 0.0266 | 2.2 | 1.2  | (0.86, 1.66) | 0.2856 | 1.1 | 1.2  | (0.84, 1.72) | 0.3199  | 1   | 0.96 | (0.65, 1.41) | 0.8428  | 0.2 |

|                 |      |              |        |     |      |              |        |     |      |              |        |     |      |              |        |     |
|-----------------|------|--------------|--------|-----|------|--------------|--------|-----|------|--------------|--------|-----|------|--------------|--------|-----|
| SOD2            | 2.01 | (1.08, 3.73) | 0.0274 | 2.2 | 2.3  | (1.20, 4.42) | 0.0122 | 2.5 | 1.46 | (0.87, 2.45) | 0.1539 | 1.4 | 1.53 | (0.88, 2.66) | 0.1353 | 1.5 |
| NT3             | 1.37 | (1.04, 1.82) | 0.0274 | 2.2 | 1.29 | (0.96, 1.74) | 0.0929 | 1.7 | 0.95 | (0.74, 1.23) | 0.7178 | 0.4 | 1    | (0.76, 1.30) | 0.986  | 0   |
| BMP6            | 1.23 | (1.02, 1.47) | 0.0278 | 2.2 | 1.17 | (0.97, 1.42) | 0.1076 | 1.6 | 1.09 | (0.91, 1.31) | 0.3624 | 0.9 | 1.08 | (0.88, 1.31) | 0.4708 | 0.7 |
| APN             | 1.53 | (1.05, 2.23) | 0.0279 | 2.2 | 1.37 | (0.92, 2.04) | 0.1161 | 1.6 | 0.96 | (0.68, 1.34) | 0.7958 | 0.3 | 0.92 | (0.64, 1.32) | 0.6636 | 0.4 |
| STK4            | 1.13 | (1.01, 1.26) | 0.0285 | 2.2 | 1.1  | (0.98, 1.24) | 0.0908 | 1.7 | 1.06 | (0.94, 1.20) | 0.3107 | 1   | 1.04 | (0.92, 1.18) | 0.5008 | 0.7 |
| AMBP            | 1.98 | (1.07, 3.64) | 0.0285 | 2.2 | 1.63 | (0.85, 3.12) | 0.1424 | 1.5 | 2.48 | (1.35, 4.55) | 0.0034 | 2.9 | 1.86 | (0.97, 3.53) | 0.06   | 1.9 |
| IL27            | 1.46 | (1.04, 2.05) | 0.0303 | 2.2 | 1.57 | (1.10, 2.26) | 0.014  | 2.5 | 1.83 | (1.22, 2.74) | 0.0036 | 2.9 | 1.77 | (1.15, 2.72) | 0.0095 | 2.6 |
| CTSL1           | 1.49 | (1.04, 2.13) | 0.0314 | 2.2 | 1.51 | (1.03, 2.20) | 0.0331 | 2.1 | 1.31 | (0.95, 1.79) | 0.0972 | 1.7 | 1.26 | (0.90, 1.76) | 0.1822 | 1.3 |
| TNFSF13B        | 1.45 | (1.03, 2.05) | 0.0322 | 2.1 | 1.35 | (0.94, 1.94) | 0.1018 | 1.6 | 1.04 | (0.76, 1.42) | 0.819  | 0.2 | 1.04 | (0.75, 1.44) | 0.8279 | 0.2 |
| MMP1            | 1.13 | (1.01, 1.28) | 0.0346 | 2.1 | 1.1  | (0.97, 1.24) | 0.1339 | 1.5 | 1.1  | (0.96, 1.25) | 0.158  | 1.4 | 1.06 | (0.92, 1.22) | 0.398  | 0.8 |
| SHPS1           | 1.38 | (1.02, 1.86) | 0.0347 | 2.1 | 1.14 | (0.83, 1.58) | 0.4173 | 0.8 | 1.19 | (0.91, 1.54) | 0.1971 | 1.3 | 1.07 | (0.81, 1.42) | 0.6111 | 0.5 |
| MMP7            | 1.18 | (1.01, 1.39) | 0.0352 | 2.1 | 1.12 | (0.95, 1.32) | 0.1941 | 1.3 | 1.1  | (0.96, 1.25) | 0.1669 | 1.4 | 1.1  | (0.96, 1.26) | 0.1809 | 1.3 |
| IL18            | 1.21 | (1.01, 1.45) | 0.0366 | 2.1 | 1.16 | (0.97, 1.41) | 0.1113 | 1.6 | 1.27 | (1.07, 1.51) | 0.0074 | 2.7 | 1.24 | (1.03, 1.49) | 0.0239 | 2.3 |
| STAMPB          | 1.14 | (1.01, 1.29) | 0.0367 | 2.1 | 1.11 | (0.97, 1.26) | 0.1225 | 1.5 | 1.03 | (0.89, 1.20) | 0.6566 | 0.4 | 1    | (0.86, 1.18) | 0.9529 | 0.1 |
| TF              | 1.44 | (1.02, 2.03) | 0.0385 | 2.1 | 1.24 | (0.86, 1.78) | 0.2487 | 1.2 | 1.55 | (1.05, 2.31) | 0.0285 | 2.2 | 1.35 | (0.89, 2.05) | 0.159  | 1.4 |
| ITGB2           | 1.38 | (1.02, 1.87) | 0.0387 | 2.1 | 1.31 | (0.95, 1.81) | 0.0988 | 1.7 | 1.02 | (0.79, 1.31) | 0.8783 | 0.2 | 1.01 | (0.77, 1.33) | 0.9216 | 0.1 |
| OSM             | 1.19 | (1.01, 1.41) | 0.0395 | 2.1 | 1.18 | (0.99, 1.41) | 0.0644 | 1.8 | 1.19 | (1.01, 1.40) | 0.0334 | 2.1 | 1.14 | (0.96, 1.36) | 0.1331 | 1.5 |
| XCL1            | 1.26 | (1.01, 1.57) | 0.0403 | 2.1 | 1.18 | (0.94, 1.49) | 0.1584 | 1.4 | 1.33 | (1.04, 1.70) | 0.0235 | 2.3 | 1.26 | (0.97, 1.64) | 0.0808 | 1.7 |
| CCL19           | 1.16 | (1.01, 1.34) | 0.0403 | 2.1 | 1.08 | (0.93, 1.26) | 0.3193 | 1   | 1.23 | (1.04, 1.47) | 0.0164 | 2.4 | 1.21 | (1.01, 1.45) | 0.0414 | 2   |
| DKK1            | 1.27 | (1.01, 1.61) | 0.0443 | 2   | 1.27 | (0.99, 1.63) | 0.0579 | 1.9 | 1.19 | (0.97, 1.46) | 0.0952 | 1.7 | 1.21 | (0.97, 1.51) | 0.091  | 1.7 |
| ALCAM           | 1.42 | (1.00, 2.02) | 0.0486 | 2   | 1.33 | (0.92, 1.92) | 0.126  | 1.5 | 1.1  | (0.79, 1.52) | 0.5788 | 0.6 | 1.03 | (0.73, 1.46) | 0.8773 | 0.2 |
| PTX3            | 1.25 | (0.99, 1.58) | 0.0597 | 1.9 | 1.24 | (0.97, 1.59) | 0.0816 | 1.7 | 1.31 | (0.97, 1.78) | 0.0778 | 1.8 | 1.43 | (1.03, 1.97) | 0.0302 | 2.2 |
| IL17D           | 1.38 | (0.99, 1.94) | 0.06   | 1.9 | 1.37 | (0.96, 1.95) | 0.0816 | 1.7 | 1.22 | (0.79, 1.89) | 0.3631 | 0.9 | 1.28 | (0.80, 2.03) | 0.3057 | 1   |
| HGDNF           | 1.3  | (0.98, 1.72) | 0.0687 | 1.8 | 1.05 | (0.78, 1.43) | 0.7318 | 0.3 | 1.17 | (0.80, 1.72) | 0.4178 | 0.8 | 1.02 | (0.68, 1.54) | 0.9082 | 0.1 |
| CXCL6           | 1.17 | (0.99, 1.38) | 0.069  | 1.8 | 1.18 | (0.99, 1.40) | 0.0677 | 1.8 | 0.99 | (0.84, 1.18) | 0.9326 | 0.1 | 1.01 | (0.84, 1.21) | 0.9013 | 0.1 |
| FGF19           | 1.15 | (0.99, 1.35) | 0.0722 | 1.8 | 1.14 | (0.97, 1.35) | 0.1164 | 1.6 | 0.93 | (0.78, 1.10) | 0.387  | 0.9 | 0.89 | (0.74, 1.08) | 0.2396 | 1.2 |
| IL17A           | 1.25 | (0.98, 1.61) | 0.0779 | 1.8 | 1.18 | (0.91, 1.53) | 0.2225 | 1.2 | 0.93 | (0.67, 1.30) | 0.6714 | 0.4 | 0.94 | (0.67, 1.33) | 0.7287 | 0.3 |
| IGGFCRECEPTORIB | 1.23 | (0.98, 1.54) | 0.0784 | 1.8 | 1.25 | (0.98, 1.58) | 0.0672 | 1.8 | 1.18 | (0.86, 1.60) | 0.3064 | 1   | 1.13 | (0.81, 1.57) | 0.466  | 0.7 |
| PARP1           | 1.13 | (0.99, 1.29) | 0.0805 | 1.7 | 1.1  | (0.95, 1.27) | 0.2035 | 1.3 | 1.16 | (1.00, 1.36) | 0.0535 | 1.9 | 1.19 | (1.00, 1.40) | 0.0435 | 2   |
| IDUA            | 1.26 | (0.97, 1.64) | 0.0834 | 1.7 | 1.25 | (0.95, 1.64) | 0.1091 | 1.6 | 1.03 | (0.82, 1.30) | 0.7905 | 0.3 | 0.94 | (0.74, 1.21) | 0.6409 | 0.5 |
| PDGFSUBUNITB    | 1.12 | (0.98, 1.27) | 0.0855 | 1.7 | 1.13 | (0.99, 1.29) | 0.0757 | 1.8 | 1.09 | (0.94, 1.27) | 0.2374 | 1.2 | 1.09 | (0.93, 1.28) | 0.2947 | 1   |
| CD40L           | 1.1  | (0.99, 1.23) | 0.0899 | 1.7 | 1.09 | (0.97, 1.23) | 0.1281 | 1.5 | 1.07 | (0.96, 1.20) | 0.2244 | 1.2 | 1.09 | (0.97, 1.23) | 0.1406 | 1.5 |
| TNFRSF10C       | 1.26 | (0.96, 1.64) | 0.0925 | 1.7 | 1.09 | (0.83, 1.45) | 0.5284 | 0.6 | 1.22 | (0.94, 1.59) | 0.1351 | 1.5 | 1.12 | (0.85, 1.48) | 0.4103 | 0.8 |
| CTSD            | 1.28 | (0.96, 1.70) | 0.0931 | 1.7 | 1.06 | (0.78, 1.43) | 0.7145 | 0.4 | 1.06 | (0.81, 1.38) | 0.6892 | 0.4 | 0.93 | (0.70, 1.24) | 0.6154 | 0.5 |
| NOTCH3          | 1.3  | (0.96, 1.75) | 0.0936 | 1.7 | 1.17 | (0.85, 1.61) | 0.3379 | 1   | 1.1  | (0.82, 1.49) | 0.5157 | 0.7 | 1.1  | (0.80, 1.51) | 0.5684 | 0.6 |
| MB              | 1.21 | (0.97, 1.50) | 0.0947 | 1.7 | 1.02 | (0.80, 1.30) | 0.894  | 0.1 | 0.98 | (0.78, 1.22) | 0.8252 | 0.2 | 0.85 | (0.66, 1.09) | 0.1947 | 1.3 |
| CD5             | 1.25 | (0.96, 1.63) | 0.0956 | 1.7 | 1.11 | (0.84, 1.48) | 0.4591 | 0.7 | 1.28 | (0.91, 1.79) | 0.1504 | 1.4 | 1.08 | (0.75, 1.55) | 0.6754 | 0.4 |
| TPA             | 1.21 | (0.97, 1.50) | 0.0975 | 1.7 | 1.11 | (0.88, 1.41) | 0.3743 | 0.9 | 0.99 | (0.82, 1.20) | 0.9333 | 0.1 | 0.96 | (0.78, 1.17) | 0.6772 | 0.4 |
| PAPPA           | 1.22 | (0.96, 1.55) | 0.0995 | 1.6 | 1.28 | (1.00, 1.65) | 0.0535 | 1.9 | 1.15 | (0.88, 1.50) | 0.2964 | 1   | 1.32 | (0.99, 1.75) | 0.0579 | 1.9 |
| COL1A1          | 1.29 | (0.95, 1.75) | 0.0996 | 1.6 | 1.11 | (0.81, 1.54) | 0.5109 | 0.7 | 1.16 | (0.84, 1.61) | 0.3769 | 0.9 | 1.1  | (0.78, 1.56) | 0.5765 | 0.6 |
| IL7             | 1.17 | (0.97, 1.41) | 0.1021 | 1.6 | 1.19 | (0.98, 1.45) | 0.086  | 1.7 | 0.96 | (0.78, 1.17) | 0.6572 | 0.4 | 0.96 | (0.78, 1.19) | 0.7271 | 0.3 |
| CCL4            | 1.16 | (0.96, 1.40) | 0.1143 | 1.6 | 1.14 | (0.94, 1.39) | 0.1714 | 1.4 | 0.98 | (0.81, 1.19) | 0.8406 | 0.2 | 0.96 | (0.78, 1.18) | 0.7178 | 0.4 |
| SCF             | 0.73 | (0.50, 1.08) | 0.115  | 1.6 | 0.73 | (0.48, 1.09) | 0.1228 | 1.5 | 1.3  | (0.93, 1.82) | 0.1216 | 1.5 | 1.25 | (0.88, 1.77) | 0.2118 | 1.2 |
| CA5A            | 1.13 | (0.97, 1.31) | 0.1184 | 1.6 | 0.99 | (0.84, 1.16) | 0.8755 | 0.2 | 1.08 | (0.90, 1.31) | 0.4065 | 0.8 | 0.95 | (0.77, 1.16) | 0.6048 | 0.5 |
| PRELP           | 1.58 | (0.89, 2.82) | 0.1185 | 1.6 | 1.36 | (0.74, 2.49) | 0.321  | 1   | 3.17 | (1.55, 6.49) | 0.0016 | 3.2 | 2.79 | (1.31, 5.94) | 0.008  | 2.7 |
| FS              | 1.29 | (0.93, 1.78) | 0.1237 | 1.5 | 1.24 | (0.88, 1.73) | 0.2173 | 1.2 | 1.4  | (1.02, 1.92) | 0.039  | 2.1 | 1.37 | (0.98, 1.91) | 0.0637 | 1.9 |
| CCL17           | 1.11 | (0.97, 1.28) | 0.1284 | 1.5 | 1.12 | (0.97, 1.29) | 0.1299 | 1.5 | 1.2  | (1.04, 1.38) | 0.0144 | 2.4 | 1.22 | (1.04, 1.42) | 0.0131 | 2.5 |
| HBEGF           | 1.27 | (0.92, 1.74) | 0.1412 | 1.5 | 1.25 | (0.90, 1.75) | 0.1831 | 1.3 | 1.29 | (0.99, 1.67) | 0.0569 | 1.9 | 1.34 | (1.01, 1.77) | 0.04   | 2.1 |

|              |      |              |        |     |      |              |        |     |      |              |        |     |      |              |        |     |
|--------------|------|--------------|--------|-----|------|--------------|--------|-----|------|--------------|--------|-----|------|--------------|--------|-----|
| ADA          | 1.21 | (0.93, 1.57) | 0.1589 | 1.4 | 1.11 | (0.85, 1.46) | 0.4453 | 0.8 | 0.84 | (0.62, 1.13) | 0.2553 | 1.1 | 0.83 | (0.61, 1.14) | 0.256  | 1.1 |
| MMP9         | 1.12 | (0.96, 1.30) | 0.1601 | 1.4 | 1.11 | (0.95, 1.31) | 0.1942 | 1.3 | 1.21 | (1.04, 1.41) | 0.0135 | 2.5 | 1.18 | (1.00, 1.39) | 0.048  | 2   |
| PAI          | 1.12 | (0.96, 1.31) | 0.1612 | 1.4 | 1.07 | (0.91, 1.27) | 0.4117 | 0.8 | 1.02 | (0.87, 1.21) | 0.7794 | 0.3 | 0.99 | (0.83, 1.18) | 0.9022 | 0.1 |
| GIF          | 0.92 | (0.81, 1.04) | 0.165  | 1.4 | 0.94 | (0.83, 1.07) | 0.3446 | 0.9 | 1.1  | (0.96, 1.27) | 0.1642 | 1.4 | 1.12 | (0.97, 1.30) | 0.1313 | 1.5 |
| FGF5         | 1.33 | (0.89, 1.97) | 0.1654 | 1.4 | 1.15 | (0.76, 1.75) | 0.5134 | 0.7 | 0.95 | (0.61, 1.50) | 0.8408 | 0.2 | 0.88 | (0.55, 1.43) | 0.6127 | 0.5 |
| FLT3L        | 1.23 | (0.92, 1.66) | 0.1682 | 1.4 | 1.18 | (0.86, 1.61) | 0.2983 | 1   | 1.05 | (0.76, 1.45) | 0.7568 | 0.3 | 0.96 | (0.68, 1.35) | 0.82   | 0.2 |
| DCN          | 1.28 | (0.90, 1.82) | 0.1728 | 1.4 | 1.15 | (0.79, 1.67) | 0.4694 | 0.7 | 1.43 | (1.02, 2.02) | 0.0391 | 2.1 | 1.33 | (0.93, 1.91) | 0.1236 | 1.5 |
| CHIT1        | 1.08 | (0.97, 1.20) | 0.1769 | 1.4 | 1.08 | (0.96, 1.20) | 0.1908 | 1.3 | 1.01 | (0.91, 1.12) | 0.8861 | 0.1 | 1.01 | (0.90, 1.13) | 0.8693 | 0.2 |
| CPB1         | 1.13 | (0.94, 1.36) | 0.18   | 1.3 | 1.1  | (0.90, 1.34) | 0.3452 | 0.9 | 1.15 | (0.95, 1.40) | 0.1547 | 1.4 | 1.1  | (0.89, 1.36) | 0.4001 | 0.8 |
| CCL3         | 1.1  | (0.95, 1.27) | 0.1882 | 1.3 | 1.05 | (0.90, 1.22) | 0.5275 | 0.6 | 1.13 | (0.91, 1.39) | 0.2599 | 1.1 | 1.05 | (0.84, 1.30) | 0.6787 | 0.4 |
| CD84         | 1.23 | (0.90, 1.67) | 0.1894 | 1.3 | 1.28 | (0.93, 1.77) | 0.1285 | 1.5 | 1.12 | (0.81, 1.55) | 0.5086 | 0.7 | 1.17 | (0.83, 1.66) | 0.3731 | 0.9 |
| UPA_CVD3     | 1.22 | (0.90, 1.65) | 0.1925 | 1.3 | 1.2  | (0.88, 1.63) | 0.251  | 1.1 | 1.05 | (0.75, 1.47) | 0.7792 | 0.3 | 1.06 | (0.74, 1.53) | 0.7324 | 0.3 |
| AXL          | 1.23 | (0.90, 1.70) | 0.1933 | 1.3 | 1.15 | (0.82, 1.62) | 0.4106 | 0.8 | 1.14 | (0.85, 1.54) | 0.388  | 0.9 | 1.08 | (0.79, 1.48) | 0.6297 | 0.5 |
| TFPI         | 1.26 | (0.87, 1.82) | 0.2131 | 1.2 | 1.25 | (0.85, 1.84) | 0.2569 | 1.1 | 0.98 | (0.71, 1.35) | 0.8866 | 0.1 | 0.96 | (0.68, 1.35) | 0.8106 | 0.2 |
| SCGB3A2      | 1.09 | (0.95, 1.26) | 0.216  | 1.2 | 1.09 | (0.94, 1.27) | 0.2515 | 1.1 | 1.04 | (0.89, 1.22) | 0.6438 | 0.5 | 0.99 | (0.83, 1.17) | 0.8647 | 0.2 |
| ANG1         | 1.08 | (0.95, 1.24) | 0.2223 | 1.2 | 1.09 | (0.95, 1.25) | 0.2388 | 1.2 | 1.06 | (0.92, 1.21) | 0.4174 | 0.8 | 1.08 | (0.93, 1.26) | 0.302  | 1   |
| EGFR         | 0.77 | (0.50, 1.18) | 0.2258 | 1.2 | 0.83 | (0.53, 1.31) | 0.4258 | 0.8 | 0.77 | (0.53, 1.10) | 0.1504 | 1.4 | 0.8  | (0.55, 1.18) | 0.2607 | 1.1 |
| DNER         | 0.8  | (0.56, 1.15) | 0.2294 | 1.2 | 0.85 | (0.58, 1.25) | 0.4125 | 0.8 | 0.41 | (0.25, 0.67) | 0.0003 | 3.6 | 0.43 | (0.26, 0.72) | 0.0012 | 3.2 |
| HO1          | 1.23 | (0.88, 1.72) | 0.2335 | 1.2 | 1.41 | (0.99, 2.01) | 0.0587 | 1.9 | 1.02 | (0.73, 1.41) | 0.9233 | 0.1 | 1.01 | (0.71, 1.43) | 0.9632 | 0   |
| TRANSC       | 0.88 | (0.70, 1.10) | 0.2543 | 1.1 | 0.89 | (0.70, 1.12) | 0.3111 | 1   | 0.83 | (0.64, 1.08) | 0.1626 | 1.4 | 0.78 | (0.59, 1.04) | 0.0863 | 1.7 |
| PIGR         | 1.44 | (0.76, 2.73) | 0.2581 | 1.1 | 1.6  | (0.82, 3.13) | 0.1693 | 1.4 | 1.89 | (1.05, 3.39) | 0.0333 | 2.1 | 1.9  | (1.01, 3.57) | 0.048  | 2   |
| PDGFSUBUNITA | 1.09 | (0.93, 1.26) | 0.2869 | 1.1 | 1.11 | (0.95, 1.31) | 0.1923 | 1.3 | 1.03 | (0.89, 1.18) | 0.7228 | 0.4 | 1.06 | (0.91, 1.23) | 0.4793 | 0.7 |
| THPO         | 1.18 | (0.87, 1.60) | 0.2963 | 1   | 1.18 | (0.86, 1.63) | 0.2984 | 1   | 1.09 | (0.80, 1.50) | 0.5843 | 0.5 | 1.11 | (0.80, 1.56) | 0.5249 | 0.6 |
| CTRC         | 0.91 | (0.77, 1.09) | 0.3048 | 1   | 0.94 | (0.78, 1.13) | 0.496  | 0.7 | 0.99 | (0.83, 1.19) | 0.9303 | 0.1 | 1.03 | (0.85, 1.26) | 0.7581 | 0.3 |
| CNTN1        | 0.85 | (0.62, 1.16) | 0.3131 | 1   | 0.86 | (0.62, 1.19) | 0.3602 | 0.9 | 0.75 | (0.54, 1.02) | 0.0654 | 1.8 | 0.76 | (0.54, 1.05) | 0.0996 | 1.6 |
| CXCL5        | 1.05 | (0.96, 1.15) | 0.3253 | 1   | 1.03 | (0.94, 1.14) | 0.4934 | 0.7 | 1    | (0.90, 1.11) | 0.9813 | 0   | 1    | (0.89, 1.12) | 0.9958 | 0   |
| IL17RA       | 1.1  | (0.90, 1.35) | 0.3346 | 1   | 1.1  | (0.89, 1.36) | 0.3577 | 0.9 | 0.95 | (0.74, 1.23) | 0.7123 | 0.4 | 0.93 | (0.71, 1.22) | 0.6185 | 0.5 |
| PROTEINBOC   | 1.19 | (0.83, 1.71) | 0.3396 | 1   | 1.17 | (0.81, 1.71) | 0.4024 | 0.8 | 1.54 | (1.02, 2.32) | 0.0385 | 2.1 | 1.59 | (1.02, 2.48) | 0.0402 | 2.1 |
| THBS2        | 1.26 | (0.78, 2.05) | 0.3475 | 0.9 | 1.11 | (0.67, 1.83) | 0.6897 | 0.4 | 2.47 | (1.51, 4.03) | 0.0003 | 3.6 | 2.33 | (1.39, 3.90) | 0.0013 | 3.2 |
| MCP4         | 1.1  | (0.89, 1.37) | 0.3822 | 0.9 | 1.07 | (0.85, 1.34) | 0.5679 | 0.6 | 0.97 | (0.78, 1.20) | 0.7668 | 0.3 | 0.99 | (0.79, 1.24) | 0.9367 | 0.1 |
| HAOX1        | 1.05 | (0.93, 1.18) | 0.4242 | 0.8 | 1.01 | (0.89, 1.14) | 0.918  | 0.1 | 0.91 | (0.80, 1.04) | 0.1691 | 1.4 | 0.87 | (0.76, 1.00) | 0.0571 | 1.9 |
| ADAMTS13     | 0.79 | (0.43, 1.44) | 0.4457 | 0.8 | 1.08 | (0.57, 2.04) | 0.8111 | 0.2 | 1.32 | (0.76, 2.31) | 0.3298 | 1   | 1.61 | (0.86, 3.03) | 0.1348 | 1.5 |
| GLO1         | 1.07 | (0.89, 1.29) | 0.4772 | 0.7 | 1.05 | (0.86, 1.27) | 0.64   | 0.5 | 1.11 | (0.90, 1.37) | 0.348  | 0.9 | 1.07 | (0.85, 1.34) | 0.5722 | 0.6 |
| TRAIL        | 1.14 | (0.79, 1.65) | 0.4776 | 0.7 | 1.12 | (0.77, 1.64) | 0.5556 | 0.6 | 0.45 | (0.29, 0.69) | 0.0003 | 3.6 | 0.42 | (0.26, 0.67) | 0.0003 | 3.6 |
| GH           | 0.97 | (0.89, 1.06) | 0.4806 | 0.7 | 0.99 | (0.90, 1.09) | 0.8655 | 0.2 | 1.05 | (0.95, 1.16) | 0.3226 | 1   | 1.1  | (0.99, 1.23) | 0.0665 | 1.8 |
| RAGE         | 1.12 | (0.82, 1.53) | 0.4918 | 0.7 | 1.2  | (0.85, 1.68) | 0.3013 | 1   | 1.25 | (0.90, 1.74) | 0.1809 | 1.3 | 1.31 | (0.91, 1.88) | 0.1528 | 1.4 |
| PSGL1        | 1.09 | (0.84, 1.41) | 0.5312 | 0.6 | 1.12 | (0.84, 1.48) | 0.4478 | 0.8 | 1.39 | (0.92, 2.09) | 0.117  | 1.6 | 1.48 | (0.95, 2.30) | 0.0795 | 1.8 |
| MARCO        | 0.9  | (0.64, 1.27) | 0.5512 | 0.6 | 0.96 | (0.66, 1.38) | 0.8067 | 0.2 | 1.09 | (0.86, 1.38) | 0.467  | 0.7 | 1.06 | (0.83, 1.35) | 0.6562 | 0.4 |
| IL13         | 1.11 | (0.79, 1.55) | 0.5531 | 0.6 | 1.22 | (0.86, 1.72) | 0.2701 | 1.1 | 0.95 | (0.62, 1.45) | 0.8094 | 0.2 | 0.92 | (0.59, 1.42) | 0.6948 | 0.4 |
| CCL28        | 1.09 | (0.81, 1.46) | 0.5589 | 0.6 | 1.11 | (0.82, 1.51) | 0.5044 | 0.7 | 1    | (0.78, 1.30) | 0.9758 | 0   | 1.09 | (0.83, 1.44) | 0.5345 | 0.6 |
| CXCL1        | 1.04 | (0.91, 1.19) | 0.566  | 0.6 | 1.03 | (0.89, 1.19) | 0.7054 | 0.4 | 1.05 | (0.89, 1.24) | 0.5851 | 0.5 | 1.05 | (0.88, 1.25) | 0.6141 | 0.5 |
| GDF2         | 0.95 | (0.78, 1.16) | 0.613  | 0.5 | 1.03 | (0.83, 1.27) | 0.8145 | 0.2 | 1.01 | (0.81, 1.26) | 0.9631 | 0   | 1.1  | (0.87, 1.40) | 0.4238 | 0.8 |
| AZU1         | 1.06 | (0.85, 1.32) | 0.618  | 0.5 | 1.06 | (0.85, 1.34) | 0.6042 | 0.5 | 1.07 | (0.91, 1.25) | 0.4075 | 0.8 | 1.07 | (0.90, 1.26) | 0.4452 | 0.8 |
| MEPE         | 1.07 | (0.83, 1.38) | 0.6191 | 0.5 | 0.95 | (0.72, 1.26) | 0.7171 | 0.4 | 0.94 | (0.72, 1.23) | 0.663  | 0.4 | 0.8  | (0.60, 1.08) | 0.1525 | 1.4 |
| IL20RA       | 0.9  | (0.56, 1.44) | 0.6494 | 0.5 | 0.94 | (0.57, 1.54) | 0.7927 | 0.3 | 1.14 | (0.46, 2.81) | 0.784  | 0.3 | 1.39 | (0.54, 3.57) | 0.496  | 0.7 |
| LPL          | 0.93 | (0.67, 1.29) | 0.6713 | 0.4 | 0.96 | (0.68, 1.35) | 0.8206 | 0.2 | 0.99 | (0.75, 1.30) | 0.9345 | 0.1 | 1    | (0.75, 1.34) | 0.9738 | 0   |
| LDLRECEPTOR  | 0.96 | (0.78, 1.18) | 0.6782 | 0.4 | 0.97 | (0.78, 1.20) | 0.7566 | 0.3 | 0.89 | (0.70, 1.13) | 0.3295 | 1   | 0.85 | (0.66, 1.09) | 0.1969 | 1.3 |
| KLK6         | 1.06 | (0.79, 1.42) | 0.7023 | 0.4 | 0.99 | (0.71, 1.38) | 0.9555 | 0.1 | 0.9  | (0.70, 1.14) | 0.3731 | 0.9 | 0.82 | (0.62, 1.09) | 0.1705 | 1.4 |

|           |      |              |        |     |      |              |        |     |      |              |        |     |      |              |        |     |
|-----------|------|--------------|--------|-----|------|--------------|--------|-----|------|--------------|--------|-----|------|--------------|--------|-----|
| CDH5      | 1.06 | (0.79, 1.41) | 0.7034 | 0.4 | 0.97 | (0.71, 1.32) | 0.8371 | 0.2 | 1.06 | (0.80, 1.42) | 0.6711 | 0.4 | 1.02 | (0.75, 1.38) | 0.9126 | 0.1 |
| TIE2      | 1.07 | (0.73, 1.58) | 0.721  | 0.4 | 1.07 | (0.72, 1.61) | 0.7347 | 0.3 | 1.41 | (0.90, 2.20) | 0.137  | 1.5 | 1.35 | (0.85, 2.14) | 0.2    | 1.3 |
| SERPINA12 | 1.02 | (0.93, 1.12) | 0.7294 | 0.3 | 0.99 | (0.90, 1.09) | 0.8486 | 0.2 | 1.15 | (0.98, 1.36) | 0.0826 | 1.7 | 1.14 | (0.96, 1.35) | 0.127  | 1.5 |
| IL1RL2    | 0.95 | (0.72, 1.26) | 0.732  | 0.3 | 0.94 | (0.71, 1.26) | 0.7027 | 0.4 | 1.24 | (0.90, 1.72) | 0.1842 | 1.3 | 1.24 | (0.88, 1.74) | 0.2277 | 1.2 |
| IL10RA    | 1.06 | (0.74, 1.53) | 0.7411 | 0.3 | 1.12 | (0.76, 1.63) | 0.5672 | 0.6 | 1.14 | (0.59, 2.21) | 0.7014 | 0.4 | 1.3  | (0.65, 2.60) | 0.4622 | 0.7 |
| EPCAM     | 0.98 | (0.86, 1.12) | 0.7485 | 0.3 | 0.96 | (0.84, 1.11) | 0.6088 | 0.5 | 0.97 | (0.83, 1.14) | 0.7455 | 0.3 | 0.94 | (0.79, 1.11) | 0.4395 | 0.8 |
| TNFB      | 0.96 | (0.73, 1.27) | 0.7851 | 0.3 | 0.98 | (0.73, 1.32) | 0.9046 | 0.1 | 0.83 | (0.62, 1.12) | 0.222  | 1.2 | 0.84 | (0.61, 1.14) | 0.263  | 1.1 |
| DLK1      | 1.02 | (0.84, 1.26) | 0.812  | 0.2 | 0.88 | (0.71, 1.11) | 0.2825 | 1.1 | 1.1  | (0.87, 1.38) | 0.4338 | 0.8 | 0.96 | (0.75, 1.25) | 0.7821 | 0.3 |
| TRAP      | 0.97 | (0.71, 1.32) | 0.8421 | 0.2 | 0.98 | (0.71, 1.35) | 0.8888 | 0.1 | 0.86 | (0.65, 1.14) | 0.3037 | 1   | 0.8  | (0.60, 1.08) | 0.1446 | 1.5 |
| TNF       | 1.02 | (0.75, 1.39) | 0.8775 | 0.2 | 1.05 | (0.76, 1.44) | 0.7876 | 0.3 | 0.99 | (0.69, 1.41) | 0.9465 | 0.1 | 1.03 | (0.71, 1.51) | 0.8614 | 0.2 |
| CCL24     | 0.99 | (0.85, 1.15) | 0.8876 | 0.1 | 1.04 | (0.89, 1.21) | 0.6233 | 0.5 | 0.97 | (0.82, 1.14) | 0.6845 | 0.4 | 0.96 | (0.81, 1.15) | 0.668  | 0.4 |
| BDNF      | 1    | (0.96, 1.05) | 0.9166 | 0.1 | 1.01 | (0.96, 1.05) | 0.8295 | 0.2 | 1.03 | (0.98, 1.09) | 0.2125 | 1.2 | 1.05 | (0.99, 1.11) | 0.095  | 1.7 |
| CPA1      | 1.01 | (0.85, 1.20) | 0.918  | 0.1 | 1    | (0.83, 1.20) | 0.9837 | 0   | 1.06 | (0.88, 1.28) | 0.5252 | 0.6 | 1.02 | (0.84, 1.25) | 0.8099 | 0.2 |
| CD6       | 0.99 | (0.79, 1.24) | 0.9181 | 0.1 | 1.04 | (0.82, 1.31) | 0.7607 | 0.3 | 0.91 | (0.70, 1.19) | 0.5062 | 0.7 | 0.91 | (0.69, 1.22) | 0.5401 | 0.6 |
| IL1RT2    | 1.01 | (0.77, 1.34) | 0.9375 | 0.1 | 0.99 | (0.74, 1.32) | 0.9496 | 0.1 | 0.97 | (0.72, 1.30) | 0.8275 | 0.2 | 0.92 | (0.67, 1.26) | 0.6147 | 0.5 |
| CCL22     | 1    | (0.89, 1.14) | 0.9398 | 0.1 | 1.01 | (0.89, 1.15) | 0.8543 | 0.2 | 1.03 | (0.88, 1.19) | 0.7421 | 0.3 | 1.07 | (0.91, 1.25) | 0.4181 | 0.8 |
| PRSS27    | 1.01 | (0.77, 1.32) | 0.9562 | 0.1 | 0.88 | (0.66, 1.17) | 0.3814 | 0.9 | 1.4  | (1.01, 1.94) | 0.0443 | 2   | 1.3  | (0.92, 1.85) | 0.1386 | 1.5 |

\*FDR 1% threshold in the discovery phase

Supplemental Table 3. Odds ratios (OR) and 95% confidence intervals (CI) for the selected proteins (significant in both discovery and replication sets with a false discovery rate of 1%) after adjustment for the matching variables (age, sex, and follow-up time), clinical risk factors (smoking, diabetes, coronary artery disease, serum creatinine, body mass index, heart rate, anti-hypertensive medication use) and correction for multiple comparisons in both discovery and replication sets

| Protein name | Discovery |              |         | Replication |              |         |
|--------------|-----------|--------------|---------|-------------|--------------|---------|
|              | OR        | (95% CI)     | P-value | OR          | (95% CI)     | P-value |
| BNP          | 1.59      | (1.38, 1.84) | <0.0001 | 1.78        | (1.52, 2.08) | <0.0001 |
| NTPROBNP     | 1.79      | (1.50, 2.14) | <0.0001 | 2.05        | (1.66, 2.53) | <0.0001 |
| TRAILR2      | 2.70      | (1.86, 3.92) | <0.0001 | 2.65        | (1.72, 4.06) | <0.0001 |
| TNFRSF13B    | 1.58      | (1.21, 2.07) | 0.0008  | 2.30        | (1.56, 3.39) | <0.0001 |
| GAL9         | 2.30      | (1.48, 3.57) | 0.0002  | 2.46        | (1.53, 3.94) | 0.0002  |
| FGF23        | 1.48      | (1.21, 1.82) | 0.0002  | 1.71        | (1.31, 2.22) | <0.0001 |
| TNFRSF10A    | 2.02      | (1.41, 2.90) | 0.0001  | 2.00        | (1.32, 3.03) | 0.0010  |
| REN          | 1.17      | (0.98, 1.41) | 0.0798  | 1.36        | (1.12, 1.66) | 0.0019  |
| TNFRSF11A    | 1.73      | (1.29, 2.32) | 0.0002  | 1.54        | (1.12, 2.11) | 0.0074  |
| GDF15        | 2.34      | (1.72, 3.19) | <0.0001 | 1.58        | (1.18, 2.12) | 0.0024  |
| FABP4        | 1.56      | (1.24, 1.96) | 0.0001  | 1.29        | (1.03, 1.63) | 0.0290  |
| SLAMF7       | 1.42      | (1.14, 1.77) | 0.0019  | 2.02        | (1.39, 2.93) | 0.0002  |
| CCL16        | 1.37      | (1.11, 1.68) | 0.0028  | 1.57        | (1.20, 2.05) | 0.0009  |
| TWEAK        | 0.60      | (0.41, 0.87) | 0.0075  | 0.58        | (0.42, 0.80) | 0.0008  |
| KIM1         | 1.30      | (1.08, 1.55) | 0.0050  | 1.33        | (1.07, 1.65) | 0.0093  |
| CD4          | 1.67      | (1.18, 2.35) | 0.0034  | 1.82        | (1.23, 2.70) | 0.0026  |
| VSIG2        | 1.25      | (0.97, 1.60) | 0.0857  | 1.46        | (1.06, 2.00) | 0.0196  |
| PON3         | 0.83      | (0.66, 1.03) | 0.0962  | 0.72        | (0.57, 0.91) | 0.0070  |
| PLGF         | 1.86      | (1.28, 2.72) | 0.0013  | 1.61        | (1.11, 2.34) | 0.0119  |
| MMP12        | 1.43      | (1.14, 1.80) | 0.0019  | 1.35        | (1.06, 1.72) | 0.0168  |
| ADM          | 2.10      | (1.46, 3.02) | <0.0001 | 1.40        | (1.01, 1.94) | 0.0408  |
| RARRES2      | 2.42      | (1.41, 4.18) | 0.0015  | 1.69        | (1.10, 2.58) | 0.0158  |
| CEACAM8      | 1.47      | (1.18, 1.83) | 0.0006  | 1.37        | (1.09, 1.74) | 0.0081  |
| SLAMF1       | 1.28      | (1.03, 1.59) | 0.0254  | 1.43        | (1.07, 1.90) | 0.0142  |
| TNFR1        | 1.98      | (1.38, 2.84) | 0.0002  | 1.27        | (0.93, 1.74) | 0.1353  |
| AGRP         | 1.65      | (1.23, 2.21) | 0.0008  | 1.66        | (1.11, 2.48) | 0.0139  |
| TNFR2        | 1.75      | (1.27, 2.42) | 0.0007  | 1.29        | (0.97, 1.70) | 0.0779  |
| IGFBP7       | 1.44      | (1.05, 1.96) | 0.0219  | 1.43        | (1.06, 1.92) | 0.0183  |
| UPAR         | 2.27      | (1.61, 3.21) | <0.0001 | 1.39        | (1.01, 1.93) | 0.0464  |
| PAR1         | 1.65      | (1.17, 2.33) | 0.0040  | 1.53        | (1.08, 2.19) | 0.0176  |
| PLC          | 1.78      | (1.17, 2.70) | 0.0065  | 1.42        | (0.97, 2.08) | 0.0743  |
| ACE2         | 1.49      | (1.17, 1.89) | 0.0012  | 1.41        | (1.08, 1.86) | 0.0131  |
| IL16         | 1.39      | (1.07, 1.80) | 0.0131  | 1.34        | (1.04, 1.72) | 0.0219  |
| TFF3         | 1.52      | (1.23, 1.87) | 0.0001  | 1.26        | (0.97, 1.63) | 0.0834  |
| OPN          | 1.81      | (1.36, 2.40) | <0.0001 | 1.36        | (1.03, 1.79) | 0.0304  |
| SPON2        | 2.64      | (1.35, 5.18) | 0.0047  | 2.04        | (1.14, 3.66) | 0.0166  |
| IL4RA        | 1.42      | (1.07, 1.90) | 0.0164  | 1.45        | (1.04, 2.02) | 0.0299  |
| TNFRSF14     | 1.77      | (1.26, 2.47) | 0.0009  | 1.26        | (0.93, 1.71) | 0.1309  |

Legend: same as in figure 1.

Supplemental Table 4. Spearman correlation between the clinical risk score variables and the selected biomarkers

|                  | <b>AGE</b> | <b>SMK</b> | <b>DM</b> | <b>CAD</b> | <b>HTN</b> | <b>BMI</b> | <b>HR</b> | <b>CR</b> |
|------------------|------------|------------|-----------|------------|------------|------------|-----------|-----------|
| <b>BNP</b>       | 0.12       | 0.02       | -0.02     | 0.18       | 0.06       | -0.03      | -0.12     | 0.08      |
| <b>NTPROBNP</b>  | 0.13       | -0.02      | -0.07     | 0.18       | 0.07       | -0.08      | -0.13     | 0.06      |
| <b>TRAILR2</b>   | 0.12       | 0.10       | 0.08      | 0.09       | 0.07       | 0.08       | -0.01     | 0.27      |
| <b>TNFRSF13B</b> | 0.00       | 0.10       | 0.07      | -0.01      | 0.03       | 0.09       | -0.05     | 0.13      |
| <b>GAL9</b>      | -0.10      | 0.18       | 0.05      | -0.04      | -0.03      | 0.14       | -0.07     | -0.02     |
| <b>FGF23</b>     | 0.00       | -0.03      | 0.05      | 0.06       | 0.11       | 0.12       | -0.03     | 0.16      |
| <b>TNFRSF10A</b> | 0.01       | 0.06       | 0.08      | 0.06       | 0.06       | 0.14       | -0.01     | 0.10      |
| <b>REN</b>       | 0.04       | 0.06       | 0.19      | 0.08       | 0.18       | 0.12       | -0.02     | 0.17      |
| <b>TNFRSF11A</b> | 0.08       | 0.04       | 0.10      | 0.06       | 0.09       | 0.16       | -0.06     | 0.22      |
| <b>GDF15</b>     | 0.15       | 0.04       | 0.13      | 0.09       | 0.15       | 0.03       | -0.01     | 0.31      |
| <b>FABP4</b>     | -0.01      | -0.04      | 0.07      | -0.02      | 0.16       | 0.36       | 0.05      | 0.04      |
| <b>SLAMF7</b>    | -0.04      | 0.02       | 0.11      | 0.04       | 0.04       | 0.08       | 0.00      | 0.10      |
| <b>CCL16</b>     | -0.02      | 0.03       | 0.01      | 0.00       | 0.10       | 0.08       | -0.01     | 0.20      |
| <b>TWEAK</b>     | -0.01      | 0.02       | -0.11     | -0.04      | -0.12      | -0.04      | -0.10     | -0.05     |
| <b>KIM1</b>      | 0.02       | 0.03       | 0.16      | 0.02       | 0.09       | 0.08       | 0.00      | 0.12      |
| <b>CD4</b>       | -0.11      | 0.20       | 0.10      | -0.01      | -0.06      | 0.10       | -0.05     | 0.00      |
| <b>VSIG2</b>     | 0.03       | 0.11       | 0.15      | 0.00       | 0.03       | 0.00       | -0.07     | 0.14      |
| <b>PON3</b>      | -0.05      | 0.07       | -0.08     | -0.13      | -0.18      | -0.26      | -0.08     | -0.11     |
| <b>PLGF</b>      | 0.13       | 0.05       | 0.03      | 0.08       | 0.04       | 0.05       | -0.05     | 0.34      |
| <b>MMP12</b>     | 0.09       | 0.12       | 0.07      | 0.15       | 0.12       | -0.01      | -0.03     | 0.20      |
| <b>ADM</b>       | 0.05       | 0.07       | 0.03      | 0.05       | 0.07       | 0.20       | -0.04     | 0.16      |
| <b>RARRES2</b>   | -0.01      | 0.06       | 0.00      | -0.03      | 0.09       | 0.12       | 0.00      | 0.14      |
| <b>CEACAM8</b>   | 0.17       | -0.07      | -0.02     | 0.06       | 0.12       | 0.06       | 0.03      | 0.19      |
| <b>SLAMF1</b>    | -0.08      | 0.10       | 0.09      | 0.03       | 0.01       | 0.13       | -0.04     | 0.15      |
| <b>TNFR1</b>     | 0.10       | 0.06       | 0.06      | 0.00       | 0.10       | 0.10       | -0.04     | 0.28      |
| <b>AGRP</b>      | 0.10       | -0.05      | 0.05      | 0.10       | 0.08       | -0.02      | -0.02     | 0.22      |
| <b>TNFR2</b>     | 0.05       | 0.09       | 0.05      | 0.00       | 0.07       | 0.06       | -0.05     | 0.20      |
| <b>IGFBP7</b>    | 0.05       | 0.03       | 0.06      | 0.01       | 0.08       | 0.03       | -0.07     | 0.18      |
| <b>UPAR</b>      | 0.07       | 0.04       | 0.01      | 0.03       | 0.08       | 0.04       | -0.02     | 0.09      |
| <b>PAR1</b>      | -0.05      | 0.17       | 0.09      | -0.08      | -0.08      | 0.07       | -0.01     | 0.01      |
| <b>PLC</b>       | 0.12       | -0.03      | 0.00      | 0.03       | 0.11       | 0.13       | -0.06     | 0.33      |
| <b>ACE2</b>      | -0.09      | 0.12       | 0.10      | 0.03       | -0.04      | 0.08       | -0.03     | 0.02      |
| <b>IL16</b>      | 0.00       | 0.08       | 0.03      | -0.04      | 0.02       | 0.14       | -0.05     | 0.03      |
| <b>TFF3</b>      | 0.08       | 0.02       | 0.06      | 0.02       | 0.16       | -0.06      | 0.01      | 0.24      |
| <b>OPN</b>       | 0.01       | 0.14       | 0.00      | 0.03       | 0.00       | 0.01       | -0.07     | 0.08      |
| <b>SPON2</b>     | -0.16      | 0.22       | 0.04      | -0.06      | -0.14      | 0.04       | -0.12     | -0.09     |
| <b>IL4RA</b>     | -0.04      | 0.15       | 0.06      | -0.01      | -0.10      | 0.01       | -0.10     | 0.01      |
| <b>TNFRSF14</b>  | 0.11       | 0.05       | 0.06      | 0.00       | 0.09       | 0.03       | -0.01     | 0.25      |

Legend: SMK, smoking, DM, diabetes mellitus; CAD, coronary artery disease; HTN, hypertension; BMI, body mass index; HR, heart rate; CR, creatinine.

Supplemental Table 5. Final adjusted stepwise forward model starting with the 39 proteins independently selected in both discovery and replication sets (discovery and replication sets “pooled” for this analysis)

| <b>Biomarker</b> | <b>OR (95%CI)</b> | <b>P-value</b> |
|------------------|-------------------|----------------|
| BNP              | 1.43 (1.25-1.64)  | <0.0001        |
| TWEAK            | 0.38 (0.28-0.50)  | <0.0001        |
| NTPROBNP         | 1.39 (1.17-1.66)  | <0.0001        |
| REN              | 1.28 (1.10-1.49)  | 0.001          |
| TRAILR2          | 1.56 (1.13-2.15)  | 0.007          |
| PON3             | 0.78 (0.65-0.94)  | 0.008          |
| CCL16            | 1.27 (1.06-1.53)  | 0.008          |
| SLAMF1           | 1.24 (1.01-1.52)  | 0.036          |

Model adjusted for matching variables (age, sex, cohort, phase, follow-up time) and clinical variables (smoking, diabetes, history of coronary artery disease, serum creatinine, body mass index, systolic blood pressure, use of antihypertensive medication, and heart rate (the clinical model) with a p-value for inclusion set at 0.05.

AUC clinical model =0.68; AUC clinical model + final protein selection =0.78 ( $\Delta$ AUC p-value <0.001).

Legend: BNP, brain natriuretic peptide; TWEAK, tumor necrosis factor (Ligand) superfamily, member 12; NTPROBNP, N-terminal prohormone brain natriuretic peptide; REN, renin; TRAILR2, TNF-related apoptosis-inducing ligand receptor 2; PON3, paraoxonase; CCL16, C-C motif chemokine 16; SLAMF1, signalling lymphocytic activation molecule.



Supplemental Table 6. Nodes of induced network linking the top proteins to incident heart failure.

| Level | Name (sorted by) | Uniprot ID | Protein / Gene                                                            | Cluster                                                   |
|-------|------------------|------------|---------------------------------------------------------------------------|-----------------------------------------------------------|
| seed  | ACE2             | Q9BYF1     | Angiotensin-converting enzyme 2                                           | Blood pressure regulation                                 |
| seed  | ADM              | P35318     | Adrenomedullin                                                            | Blood pressure regulation                                 |
| seed  | AGRP             | O00253     | Agouti-related protein                                                    | Metabolism                                                |
| seed  | BNP              | P16860     | Natriuretic peptides B / N-terminal prohormone brain natriuretic peptide  | Blood pressure regulation                                 |
| seed  | CCL16            | O15467     | C-C motif chemokine 16                                                    | Inflammation and apoptosis                                |
| seed  | CD4              | P01730     | T-cell surface glycoprotein CD4                                           | Inflammation and apoptosis                                |
| seed  | CEACAM8          | P31997     | Carcinoembryonic antigen related cell adhesion molecule 8                 | Extracellular matrix remodelling, angiogenesis and growth |
| seed  | FABP4            | P15090     | Fatty acid-binding protein, adipocyte                                     | Metabolism                                                |
| seed  | FGF23            | Q9GZV9     | Fibroblast growth factor 23                                               | Blood pressure regulation                                 |
| seed  | GAL9             | O00182     | Galectin-9                                                                | Extracellular matrix remodelling, angiogenesis and growth |
| seed  | GDF15            | Q99988     | Growth/differentiation factor 15                                          | Extracellular matrix remodelling, angiogenesis and growth |
| seed  | IGFBP7           | Q16270     | Insulin-like growth factor-binding protein 7                              | Inflammation and apoptosis                                |
| seed  | IL16             | Q14005     | Pro-interleukin-16                                                        | Inflammation and apoptosis                                |
| seed  | IL4RA            | P24394     | Interleukin-4 receptor subunit alpha                                      | Inflammation and apoptosis                                |
| seed  | KIM1             | Q96D42     | Kidney injury molecule 1/Hepatitis A virus cellular receptor 1            | Inflammation and apoptosis                                |
| seed  | MMP12            | P39900     | Matrix metalloproteinase-12                                               | Extracellular matrix remodelling, angiogenesis and growth |
| seed  | OPN              | P10451     | Osteopontin                                                               | Extracellular matrix remodelling, angiogenesis and growth |
| seed  | PAR1             | P25116     | Proteinase-activated receptor 1 / Coagulation Factor II Thrombin Receptor | Blood pressure regulation                                 |
| seed  | PLC              | P98160     | Perlecan                                                                  | Extracellular matrix remodelling, angiogenesis and growth |
| seed  | PLGF             | P49763     | Placenta growth factor                                                    | Extracellular matrix remodelling, angiogenesis and growth |
| seed  | PON3             | Q15166     | Paraoxonase 3                                                             | Metabolism                                                |
| seed  | RARRES2          | Q99969     | Retinoic acid receptor responder 2                                        | Metabolism                                                |
| seed  | REN              | P00797     | Renin                                                                     | Blood pressure regulation                                 |
| seed  | SLAMF1           | Q13291     | Signaling lymphocytic activation molecule                                 | Inflammation and apoptosis                                |
| seed  | SLAMF7           | Q9NQ25     | SLAM family member 7                                                      | Inflammation and apoptosis                                |
| seed  | SPON2            | Q9BUD6     | Spondin 2                                                                 | Extracellular matrix remodelling, angiogenesis and growth |
| seed  | TFF3             | Q07654     | Trefoil factor 3                                                          | Inflammation and apoptosis                                |
| seed  | TNFR1            | P19438     | Tumor necrosis factor receptor 1                                          | Inflammation and apoptosis                                |
| seed  | TNFR2            | P20333     | Tumor necrosis factor receptor 2                                          | Inflammation and apoptosis                                |

| Level        | Name (sorted by) | Uniprot ID | Protein / Gene                                                                                | Cluster                                                                               |
|--------------|------------------|------------|-----------------------------------------------------------------------------------------------|---------------------------------------------------------------------------------------|
| seed         | TNFRSF10A        | O00220     | Tumor necrosis factor receptor superfamily member 10A                                         | Inflammation and apoptosis                                                            |
| seed         | TNFRSF11A        | Q9Y6Q6     | Tumor necrosis factor receptor superfamily member 11A                                         | Inflammation and apoptosis                                                            |
| seed         | TNFRSF13B        | O14836     | Tumor necrosis factor receptor superfamily member 13B                                         | Inflammation and apoptosis                                                            |
| seed         | TNFRSF14         | Q92956     | Tumor necrosis factor receptor superfamily member 14                                          | Inflammation and apoptosis                                                            |
| seed         | TRAILR2          | O14763     | TNF-related apoptosis-inducing ligand receptor 2                                              | Inflammation and apoptosis                                                            |
| seed         | TWEAK            | O43508     | Tumor necrosis factor (Ligand) superfamily, member 12                                         | Inflammation and apoptosis                                                            |
| seed         | UPAR             | Q03405     | Urokinase plasminogen activator surface receptor                                              | Extracellular matrix remodelling, angiogenesis and growth                             |
| seed         | VSIG2            | Q96IQ7     | V-set and immunoglobulin domain-containing protein 2                                          | Inflammation and apoptosis                                                            |
| intermediate | AGT              | P01019     | Angiotensinogen                                                                               | Blood pressure regulation                                                             |
| intermediate | Angiotensin I    |            | Angiotensin I                                                                                 | Blood pressure regulation                                                             |
| intermediate | Angiotensin II   |            | Angiotensin II                                                                                | Blood pressure regulation                                                             |
| intermediate | CERCAM           | Q5T4B2     | Inactive glycosyltransferase 25 family member 3 / Cerebral endothelial cell adhesion molecule | Extracellular matrix remodelling, angiogenesis and growth                             |
| intermediate | CIP2A            | Q8TCG1     | Cancerous inhibitor of PP2A                                                                   | Inflammation and apoptosis                                                            |
| intermediate | DNAJA1           | P31689     | DnaJ homolog subfamily A member 1                                                             | Inflammation and apoptosis                                                            |
| intermediate | ERAP1            | Q9NZ08     | Endoplasmic reticulum aminopeptidase 1                                                        | Inflammation and apoptosis                                                            |
| intermediate | FAP              | Q12884     | Prolyl endopeptidase FAP                                                                      | Extracellular matrix remodelling, angiogenesis and growth                             |
| intermediate | FAS              | P25445     | Fas Cell Surface Death Receptor/ Tumor necrosis factor receptor superfamily member 6          | Inflammation and apoptosis                                                            |
| intermediate | FBLN1            | P23142     | Fibulin 1                                                                                     | Extracellular matrix remodelling, angiogenesis and growth                             |
| intermediate | FBN1             | P35555     | Fibrillin-1                                                                                   | Extracellular matrix remodelling, angiogenesis and growth                             |
| intermediate | FUT11            | Q495W5     | Fucosyltransferase 11                                                                         | Extracellular matrix remodelling, angiogenesis and growth                             |
| intermediate | GALNT18          | Q6P9A2     | Polypeptide N-Acetylgalactosaminyltransferase 18                                              | Extracellular matrix remodelling, angiogenesis and growth                             |
| intermediate | GHRL             | Q9UBU3     | Ghrelin                                                                                       | Metabolism                                                                            |
| intermediate | GRN              | P28799     | Granulin/Epithelin                                                                            | Inflammation and apoptosis /Extracellular matrix remodelling, angiogenesis and growth |
| intermediate | HIF1A/ARNT       | /          | Hypoxia-inducible factor 1-alpha/Aryl hydrocarbon receptor nuclear translocator complex       |                                                                                       |
| intermediate | HNF1B            | P35680     | Hepatocyte nuclear factor 1-beta                                                              |                                                                                       |
| intermediate | KRT18            | P05783     | Keratin, type I cytoskeletal 18                                                               | Inflammation and apoptosis                                                            |
| intermediate | LAMA1            | P25391     | Laminin Subunit Alpha 1                                                                       | Extracellular matrix remodelling, angiogenesis and growth                             |
| intermediate | LARGE1           | O95461     | LARGE xylosyl- and glucuronyltransferase 1                                                    | Extracellular matrix remodelling, angiogenesis and growth                             |
| intermediate | LTA              | P01374     | Lymphotoxin Alpha                                                                             | Inflammation and apoptosis                                                            |
| intermediate | NAGLU            | P54802     | N-Acetyl-Alpha-Glucosaminidase                                                                | Extracellular matrix remodelling, angiogenesis and growth                             |
| intermediate | NFkB             | /          | Nuclear factor NF-kappa-B complex                                                             | Inflammation and apoptosis                                                            |

| <b>Level</b> | <b>Name<br/>(sorted by)</b> | <b>Uniprot<br/>ID</b> | <b>Protein / Gene</b>                                                 | <b>Cluster</b>                                            |
|--------------|-----------------------------|-----------------------|-----------------------------------------------------------------------|-----------------------------------------------------------|
| intermediate | NID1                        | P14543                | Nidogen 1/Entactin                                                    | Extracellular matrix remodelling, angiogenesis and growth |
| intermediate | NID2                        | Q14112                | Nidogen 2/Osteonidogen                                                | Extracellular matrix remodelling, angiogenesis and growth |
| intermediate | S100A10                     | P60903                | S100 Calcium Binding Protein A10                                      | Inflammation and apoptosis                                |
| intermediate | SERTAD3                     | Q9UJW9                | SERTA domain-containing protein 3                                     |                                                           |
| intermediate | SLC1A1                      | P43005                | Excitatory amino acid transporter 3                                   | Inflammation and apoptosis                                |
| intermediate | SSR4                        | P51571                | Translocon-associated protein subunit delta                           | Inflammation and apoptosis                                |
| intermediate | STAT6                       | P42226                | Signal Transducer And Activator Of Transcription 6 dimer              |                                                           |
| intermediate | TNFRSF25                    | Q93038                | TNF Receptor Superfamily Member 25                                    | Inflammation and apoptosis                                |
| intermediate | TNFSF10                     | P50591                | TNF Superfamily Member 10                                             | Inflammation and apoptosis                                |
| intermediate | TNFSF13                     | O75888                | Tumor Necrosis Factor (Ligand) Superfamily, Member 13                 | Inflammation and apoptosis                                |
| intermediate | TP53                        | P04637                | Tumor Protein P53                                                     |                                                           |
| intermediate | TP73                        | O15350                | Tumor Protein P73                                                     |                                                           |
| intermediate | TRADD                       | Q15628                | Tumor necrosis factor receptor type 1-associated DEATH domain protein | Inflammation and apoptosis                                |
| intermediate | TRAF2                       | Q12933                | TNF Receptor Associated Factor 2                                      | Inflammation and apoptosis                                |
| intermediate | TRAF3                       | Q13114                | TNF Receptor Associated Factor 3                                      | Inflammation and apoptosis                                |
| intermediate | TRAF5                       | O00463                | TNF receptor-associated factor 5                                      | Inflammation and apoptosis                                |
| intermediate | VEGFA                       | P15692                | Vascular Endothelial Growth Factor A                                  | Extracellular matrix remodelling, angiogenesis and growth |

Supplemental Table 7. Results of overrepresentation analysis on GO for selected top proteins against all measured proteins as background.

| GO process and function                                               | Number of proteins in GO item | Number of proteins on OLINK panel | Proteins in GO process on OLINK panel (with Entrez Gene ID)                                                                                                                                                                                                                    | Number of selected proteins | Selected proteins (with Entrez Gene ID)                                                                                                                                                                                                                                        | p-value  |
|-----------------------------------------------------------------------|-------------------------------|-----------------------------------|--------------------------------------------------------------------------------------------------------------------------------------------------------------------------------------------------------------------------------------------------------------------------------|-----------------------------|--------------------------------------------------------------------------------------------------------------------------------------------------------------------------------------------------------------------------------------------------------------------------------|----------|
| <i>death receptor activity (GO:0005035)</i>                           | 11                            | 5                                 | 7132 TNFRSF1A : TNF receptor superfamily member 1A<br>7133 TNFRSF1B : TNF receptor superfamily member 1B<br>8792 TNFRSF11A : TNF receptor superfamily member 11a<br>8797 TNFRSF10A : TNF receptor superfamily member 10a<br>8764 TNFRSF14 : TNF receptor superfamily member 14 | 5 (100.0%)                  | 7132 TNFRSF1A : TNF receptor superfamily member 1A<br>7133 TNFRSF1B : TNF receptor superfamily member 1B<br>8792 TNFRSF11A : TNF receptor superfamily member 11a<br>8797 TNFRSF10A : TNF receptor superfamily member 10a<br>8764 TNFRSF14 : TNF receptor superfamily member 14 | 5.47E-05 |
| <i>tumor necrosis factor-activated receptor activity (GO:0005031)</i> | 9                             | 4                                 | 7132 TNFRSF1A : TNF receptor superfamily member 1A<br>7133 TNFRSF1B : TNF receptor superfamily member 1B<br>8792 TNFRSF11A : TNF receptor superfamily member 11a<br>8764 TNFRSF14 : TNF receptor superfamily member 14                                                         | 4 (100.0%)                  | 7132 TNFRSF1A : TNF receptor superfamily member 1A<br>7133 TNFRSF1B : TNF receptor superfamily member 1B<br>8792 TNFRSF11A : TNF receptor superfamily member 11a<br>8764 TNFRSF14 : TNF receptor superfamily member 14                                                         | 0.000409 |
| <i>renal system process (GO:0003014)</i>                              | 116                           | 5                                 | 133 ADM : adrenomedullin<br>2149 F2R/PAR1 : coagulation factor II thrombin receptor<br>4879 NPPB : natriuretic peptide B<br>5155 PDGFB : platelet derived growth factor subunit B<br>5972 REN : renin                                                                          | 4 (80.0%)                   | 133 ADM : adrenomedullin<br>2149 F2R/PAR1 : coagulation factor II thrombin receptor<br>4879 NPPB : natriuretic peptide B<br>5972 REN : renin                                                                                                                                   | 0.001827 |

| <b>GO process and function</b>                                     | <b>Number of proteins in GO item</b> | <b>Number of proteins on OLINK panel</b> | <b>Proteins in GO process on OLINK panel (with Entrez Gene ID)</b>                                                                                                                                                                                                                                                       | <b>Number of selected proteins</b> | <b>Selected proteins (with Entrez Gene ID)</b>                                                                                                                                                 | <b>p-value</b> |
|--------------------------------------------------------------------|--------------------------------------|------------------------------------------|--------------------------------------------------------------------------------------------------------------------------------------------------------------------------------------------------------------------------------------------------------------------------------------------------------------------------|------------------------------------|------------------------------------------------------------------------------------------------------------------------------------------------------------------------------------------------|----------------|
| <i>regulation of systemic arterial blood pressure (GO:0003073)</i> | 91                                   | 8                                        | 133 ADM : adrenomedullin<br>1522 CTSZ : cathepsin Z<br>2149 F2R/PAR1 : coagulation factor II thrombin receptor<br>4879 NPPB : natriuretic peptide B<br>5155 PDGFB : platelet derived growth factor subunit B<br>5972 REN : renin<br>6648 SOD2 : superoxide dismutase 2<br>59272 ACE2 : angiotensin I converting enzyme 2 | 5<br>(62.5%)                       | 133 ADM : adrenomedullin<br>2149 F2R/PAR1 : coagulation factor II thrombin receptor<br>4879 NPPB : natriuretic peptide B<br>5972 REN : renin<br>59272 ACE2 : angiotensin I converting enzyme 2 | 0.002169       |

Supplemental Figure 1. Sample handling diagram

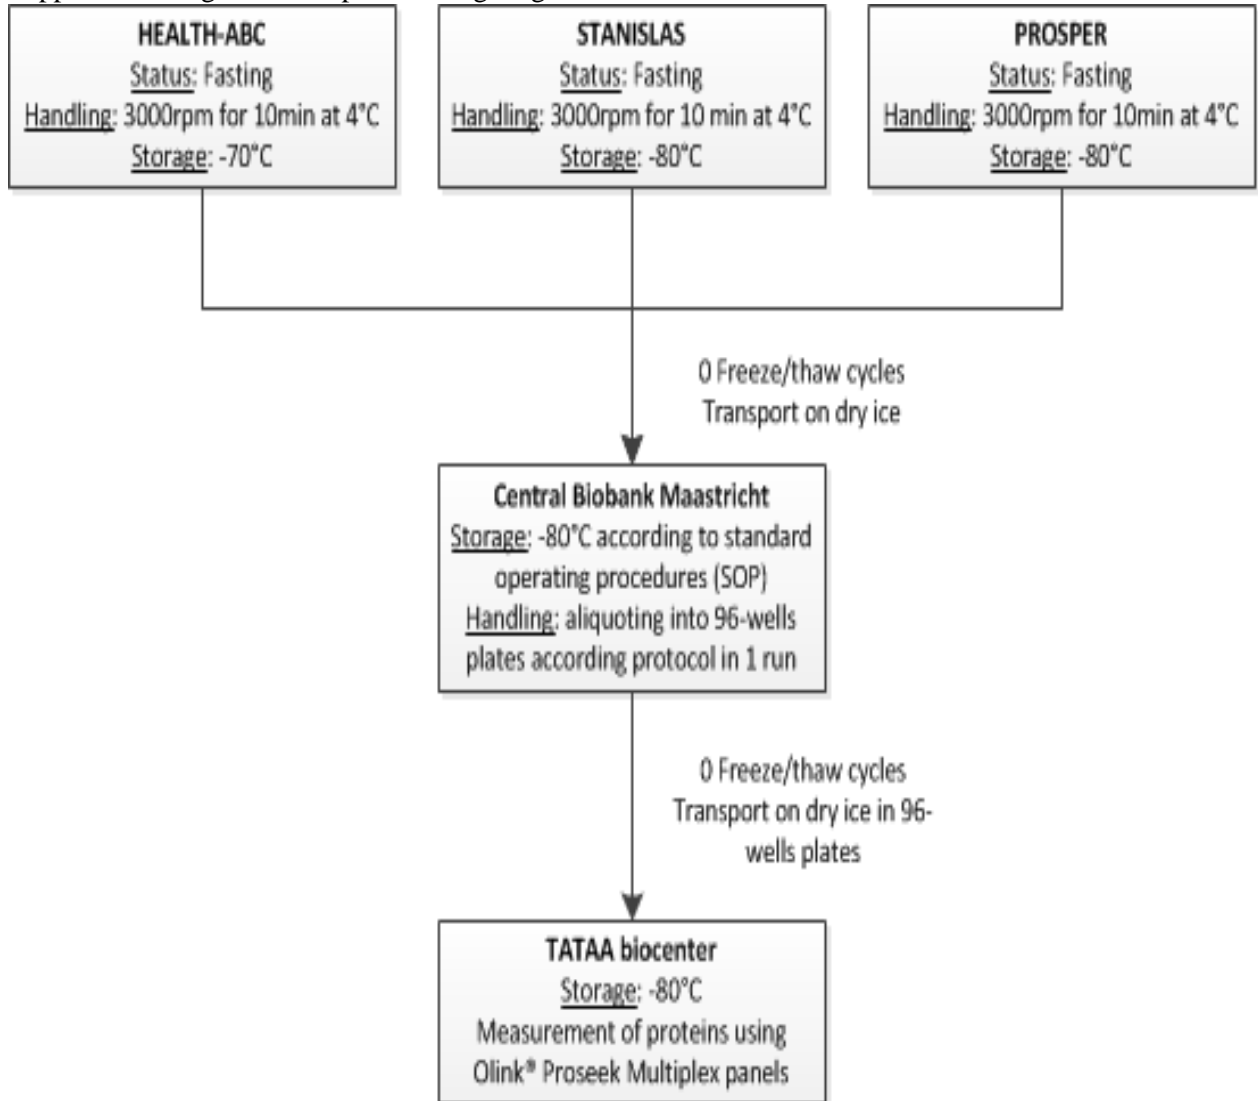

Supplemental Figure 2. The two major clusters inflammatory/apoptosis and blood pressure regulation were also detected as the main groups using the ClueGO network analysis

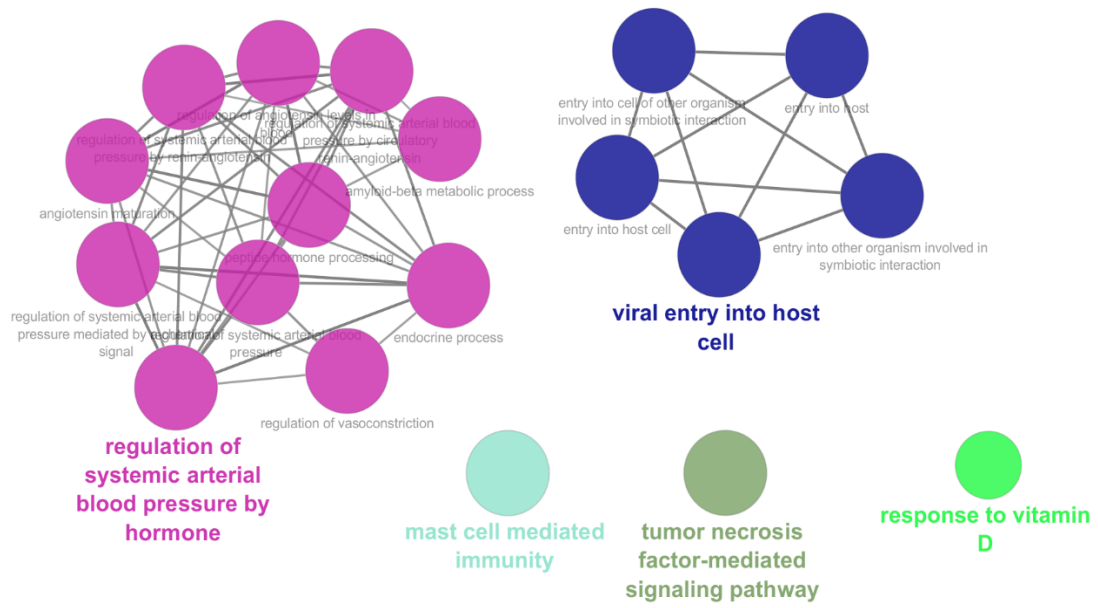

## Supplemental addenda 1. Material and Methods for the Olink® technology

Proteins were measured using the Olink® CVDII, CVDIII, and Inflammation panels\* (Olink Proteomics AB, Uppsala, Sweden) according to the manufacturer's instructions. The Proximity Extension Assay (PEA) technology used for the Olink protocol has been well described (Assarsson et al, 2014; accessible at: <https://journals.plos.org/plosone/article?id=10.1371/journal.pone.0095192>), and enables 92 analytes to be analyzed simultaneously, using 1µL of each sample. In brief, pairs of oligonucleotide-labeled antibody probes bind to their targeted protein, and if the two probes are brought in close proximity the oligonucleotides will hybridize in a pair-wise manner. The addition of a DNA polymerase leads to a proximity-dependent DNA polymerization event, generating a unique PCR target sequence. The resulting DNA sequence is subsequently detected and quantified using a microfluidic real-time PCR instrument (Biomark HD, Fluidigm). The resulting Ct-data is then quality controlled and normalized using a set of internal and external controls. The final assay read-out is presented in Normalized Protein eXpression (NPX) values, which is an arbitrary unit on a log<sub>2</sub>-scale where a high value corresponds to a higher protein expression. The four internal controls are designed to mimic and monitor the different steps of the PEA. They consist of two non-human proteins with matching antibody-probes that functions as incubation/immuno controls, an IgG antibody with two matching probes attached to it that functions as an extension control and a complete double-stranded amplicon that function as detection control. The internal controls are introduced to all samples as well as to the external controls. The external controls consist of a triplicate of negative controls used to calculate the limit of detection (LOD), as well as a triplicate of interplate controls (IPCs) containing 92 sets of antibodies with both matching probes for each assay attached to them that are used for normalization. For each sample and assay NPX is calculated by the following equations: 1.  $Ct_{(analyte)} - Ct_{(extension\ control)} = dCt_{(analyte)}$  (to decrease technical variation) 2.  $dCt_{(analyte)} - Ct_{(median\ IPC)} = ddCt_{(analyte)}$  (to improve inter plate variation) 3.  $Correction\ factor_{(analyte)} - ddCt_{(analyte)} = NPX_{(analyte)}$  (for more intuitive data). The correction factor is a set variable unique for each assay and reagent lot.

Quality control of the data is performed in two steps: First, the standard deviation for each of the incubation/immuno controls and the detection control is calculated for each run. A run will only pass quality control if the standard deviation for each of the controls is below 0.2. Secondly, each sample is quality controlled using incubation control 2 and the detection control. The run median of each of the controls is calculated and all samples within the run is compared to that. Samples that fall more than +/- 0.3 NPX from the plate median with regards to these two controls will fail the quality control and receive a QC warning in the data output file.

All assay validation data (detection limits, intra- and inter-assay precision data, etc.) are available on manufacturer's website ([www.olink.com](http://www.olink.com)).

\* Previously branded as Olink® Multiplex panels.

An example of a QC-plot is provided below:



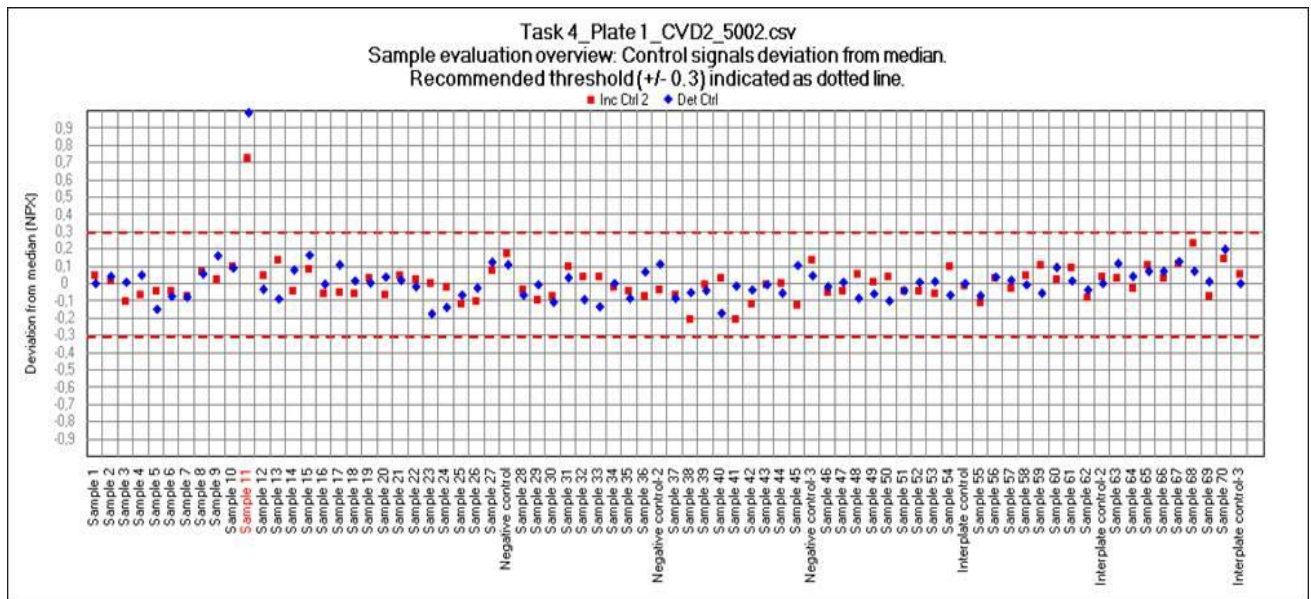

## Technical description Olink Proximity Extension Assay

### Overview

Olink Proteomics has developed a unique protein detection system called Proximity Extension Assay (PEA), which enables highly specific and sensitive multiplex immunoassays for the detection of 92 different proteins in 90 samples simultaneously, generating 9260 data points in a single run. These proteins can be measured in a large variety of human sample types using as little as one microliter volume of sample. To date, >25 different biological matrices have been tested, all of which have proven compatible with PEA. Olink Proteomics currently offers assays for more than 977 proteins. During PEA, protein targets are ID-tagged by unique DNA amplicons that are subsequently detected and quantified by real-time PCR using Fluidigm's BioMark HD system. In doing so, the platform harnesses the highly parallel nature of Fluidigm's Dynamic Array IFC (Integrated Fluidic Circuit) technology, bringing the assays to the high throughput, reproducibility and superior sensitivity realm of the BioMark HD.

Measurements performed with the Proseek<sup>®</sup> Multiplex assays are semi-quantitative, where changes in protein levels in one group or population are quantified relative to another. The assays generate quantitation cycle (Cq) values that are then normalized and converted to Olink's arbitrary Normalized Protein eXpression (NPX) unit, which can be used for further statistical analyses. NPX gives relative quantification. NPX is on a log<sub>2</sub> scale. NPX should be compared between samples for each assay separately.

The analytical performance is thoroughly validated during product development to ensure the highest standards of sensitivity, precision, specificity and dynamic range. Since traceable calibrators are not yet available for all proteins in Olink's portfolio, performance is evaluated by using full length recombinant proteins as well as well characterized normal and diseased plasma/serum samples.

Repeatability of the measurements is reflected by an average intra-assay variation of 5-10% CV, and inter-assay variation 10-20% CV.

Multiple head-to-head comparisons have been performed against golden-standard single-plex ELISA assays in clinical settings (e.g. NT-pro-BNP, OPN, ST2). So far, these tests have demonstrated strong positive correlation, and have indicated similar, and sometimes superior, levels of sensitivity for Olink's PEA-based assays.

The real strength of Olink's technology is that it offers a high-throughput capacity coupled to a growing list of analytes, therefore placing the platform in a strong position for biomarker selection. Furthermore, the development of new multiplex assays is very rapid thanks to a conjugation procedure that works well on all antibody subtypes tested so far, universal incubation conditions and minimal probe concentrations used in our assays. Olink Proteomics currently offers 12 pre-designed 92-plex panels.

### **Detailed technical description**

#### Measurements

##### 1. Accuracy and reproducibility of the measurements:

Olink's multiplex assays are validated following the standard procedure for immunoassays. Proseek® Multiplex measurements are semi-quantitative, where changes in protein levels are determined and compared for each protein separately. Due to the nature of relative quantification, no calibration standards are needed leaving room for more biological samples on the plate and, thus, higher throughput.

The output from the Proseek Multiplex protocol is in quantitation cycles (Cq) produced by the BioMark's Real-Time PCR Software. To minimize variation within and between runs, the data is normalized using both an internal control (Extension Control) and an Inter-Plate Control (IPC), and data is transformed using a pre-determined correction factor. The pre-processed data will be in the arbitrary unit NPX (Normalized Protein eXpression), which can be used for further statistical analyses.

##### 2. Volume:

As little as 1  $\mu$ l of sample is required to analyse 92 proteins in a single measurement. The amount of data generated increases proportionally with the volume of analysed sample, so that 2  $\mu$ l produces data for 184 proteins and so forth.

##### 3. Number of proteins:

92 proteins are quantified for each sample in a single run.

##### 4. Sample types:

Proseek® Multiplex assays are designed for detection of proteins in complex human biofluids. Proseek® Multiplex assays are validated using both EDTA plasma and serum samples. Furthermore, a wide range of additional sample types are compatible with the technology, such as citrate and heparin plasma, CSF, urine, saliva, tissue and cell lysates, cell culture media, dried blood spots and

many more. See Table 1 at the end of this document for information about some of the sample types that have been analyzed so far. Olink is open to discussion and exploration of untested sample types.

#### 5. Correlation and agreement:

Correlation studies have been carried out for a subset of proteins to compare Olink's Proseek® Multiplex assays to commercial singleplex ELISA/conventional analyses in clinical settings. Olink assays have so far displayed high correlations with these established tests, both in Olink's own Service Laboratory and external, customer-led evaluations, demonstrating the accuracy and parallelism of the PEA technology. PEA is described by a peer-reviewed publication in PLOS one: Homogenous 96-Plex PEA Immunoassay Exhibiting High Sensitivity, Specificity, and Excellent Scalability. Assarsson and Lundberg *et al.*, 2014.

#### 6. Validation:

During the validation procedure, Olink analyzes matched plasma (three different anti-coagulants) and serum samples, and reports their respective protein levels relative to the measurements in EDTA plasma. This varies for each biomarker and is presented in the Validation Data package for each panel. Intra- and inter-assays precision values are also determined for each protein and presented in the Validation Data Packages which can be found on <http://www.olink.com/proseek-multiplex/>.

In a recent pilot wellness study, EDTA plasma was taken from 88 well-characterized individuals at three different time points (every 3 months) and each sample was analyzed using multiple Proseek® Multiplex panels. A large proportion of biomarkers correlated significantly well across the different time points for each individual, while some proteins revealed distinct expression patterns that varied with time. It is also worth mentioning that the inflammation panel was able to identify the signs of infection and single out an individual who had been suffering from illness during one of the three time points (data not shown).

These data further strengthen the case for the robustness of the technology and its potential for future longitudinal studies.

#### 7. Information:

The platform was recently used to investigate the effects of freezer storage, chronological age at sampling, season and month of the year on the abundance levels of 108 proteins in 380 plasma samples collected from 106 Swedish women: "Effects of Long-Term Storage Time and Original Sampling Month on Biobank Plasma Protein Concentrations" Enroth *et al.*, 2016.

The study found that storage time can explain 4.8-34.9% of the observed variance, and that the chronological age at sample collection after adjustment for storage-time explains 1.1-33.5% of the observed variance.

Another recent study performed at the Karolinska Institute, using samples from the BBMRI BioBank in Stockholm, found that proteins are stable for consistent measurements by PEA, even after 8 short, successive freeze-thaw cycles (manuscript in preparation).

The first Olink panel was launched on the 1<sup>st</sup> of March 2013 and since then the technology has been used to analyse over 235 000 samples. This has so far led to 57 publications, in the form of technology reviews and customer applications, demonstrating that Olink's semi-quantitative approach for measuring biomarker levels is approved by referees. More publications are in the pipeline as Olink continues to analyse protein biomarkers for life science researchers around the world. For a complete list of publications see; <http://www.olink.com/data-you-can-trust/publications/>

Olink will work closely with customers to produce smaller and focused custom panels, to support the future development of diagnostic tools based on clinically relevant protein signatures.

Finally, with the help of bio-informatics tools, Olink proteomics is currently developing ways of extending the biological information provided about the proteins in each panel. In doing so, Olink intends to go beyond the simple provision of technology and reagents by simultaneously catering knowledge for the field of protein biomarker discovery. Olink Proteomics provides first-class support to our customers. With our unparalleled experience and skills working with Proseek® Multiplex panels, the support team quickly delivers the best assistance, free of charge. Olink Proteomics also offers professional statistical analysis services. Our in-house team of biostatisticians can help you with customized statistical analyses tailored to your requirements.

All assay validation data (detection limits, intra- and inter-assay precision data, etc) are available on manufacturer's website ([www.olink.com](http://www.olink.com)).

## **Instrumentation**

### 1. Automation:

The Fluidigm BioMark HD combined with a controller or Juno is able to load all reagents into the microfluidic circuits and can be left to operate protocols unattended during the run. The Dynamic Arrays have an integrated network of channels, chambers and valves that automatically combine the reactions, conserving time, reagents and sample volumes. Initial pipetting is needed to pipette samples and reagents into the micro-well section of the dynamic arrays. Automatic sample and assay mixing of Fluidigm integrated fluidic circuit (IFCs) reduces pipetting by 95% compared to conventional PCR microplate-based systems. The IFC is subsequently placed in the controller (either HX or Juno). The samples do not come in contact with the interface plate which is within the controllers. However, it is possible to remove the interface plate and clean with 70% Ethanol as an additional measure between runs. Furthermore, it is possible to automate this using liquid handling instruments as the dynamic arrays have a Society for Biomolecular Sciences (SBS)-compatible format enabling manual and/or 384-well plate format handling and standard dispensing equipment.

By using Fluidigm 96.96 IFCs it is possible to analyse 90 samples + 6 controls in a single run on the BioMark HD. At a rate of 3 to 4 IFCs per day, the platform is largely capable of supporting the proposed scale of proteomic studies. Dedicated staff can achieve up to 360 samples per day (4 IFCs), which translates into  $4 \times 9216 = 36864$  data points in one day per BioMark HD system.

## 2. Accuracy and Reproducibility:

The repeatability and reproducibility of Olink multiplex assays is determined by using spiked and unspiked serum and plasma samples. These reference samples are generated to cover a wide concentration range for each protein target in order to mimic large biological variation, and are analysed by several (external) operators/service providers. Olink assays display an average intra-assay variation of 5-10% and a 10-20% inter-assay variation. The variation between runs is naturally slightly higher, with the highest variation observed for assays that measure samples close to the Limit of Detection (LOD).

### Sample types:

Table 1. Assay detectability in different sample types: Number of proteins detected in healthy blood donors

| Sample Type    | Panels                          |                                 |                                     |                                 |                                     |
|----------------|---------------------------------|---------------------------------|-------------------------------------|---------------------------------|-------------------------------------|
|                | CVD II                          | CVD III                         | ONC II                              | INF I                           | NEU I                               |
| Whole blood    | NT                              | NT                              | NT                                  | NT                              | NT                                  |
| Plasma EDTA    | AS<br>99% in >75%<br>of samples | AS<br>98% in >75%<br>of samples | AS<br>100% in<br>>75% of<br>samples | AS<br>80% in >75%<br>of samples | AS<br>100% in<br>>75% of<br>samples |
| Plasma Heparin | AS                              | AS                              | AS                                  | AS                              | AS                                  |
| Plasma Citrate | AS                              | AS                              | AS                                  | AS                              | AS                                  |
| Serum          | AS<br>97% in >75%<br>of samples | AS<br>99% in >75%<br>of samples | AS<br>100% in<br>>75% of<br>samples | AS<br>82% in >75%<br>of samples | AS<br>98% in<br>>75% of<br>samples  |
| Urine          | NT                              | NT                              | NT                                  | AS<br>37% in >75%<br>of samples | NT                                  |
| PBMC           | NT                              | NT                              | NT                                  | AS<br>73% in >75%<br>of samples | NT                                  |

Additional sample-types include, but are not limited to:

|                                  |                                                    |                                                    |                                               |                                               |                                    |
|----------------------------------|----------------------------------------------------|----------------------------------------------------|-----------------------------------------------|-----------------------------------------------|------------------------------------|
| <b>CSF</b>                       | AS<br>70% in >75%<br>samples                       | AS<br>61% in >75%<br>samples                       | AS<br>76% in >75%<br>samples                  | AS<br>62% in >75%<br>samples                  | AS<br>85% in<br>>75%<br>samples    |
| <b>Exosomes</b>                  | AS<br>48% in >75%<br>samples<br>(plasma<br>origin) | AS<br>38% in >75%<br>samples<br>(plasma<br>origin) | AS<br>37% in >75%<br>samples<br>(cell origin) | AS<br>27% in >75%<br>samples<br>(cell origin) | NT                                 |
| <b>Saliva</b>                    | NT                                                 | NT                                                 | NT                                            | AS<br>63% in >75%<br>of samples               | NT                                 |
| <b>Synovial fluid</b>            | AS<br>46% in >75%<br>of samples                    | NT                                                 | NT                                            | AS<br>41% in >75%<br>of samples               | NT                                 |
| <b>Cell lysates</b>              | AS<br>33% in >75%<br>of samples                    | AS<br>34% in >75%<br>of samples                    | AS<br>41% in >75%<br>of samples               | AS<br>38% in >75%<br>of samples               | NT                                 |
| <b>Tissue lysates</b>            | NT                                                 | NT                                                 | NT                                            | AS<br>79 % in<br>>75%<br>samples              | AS<br>86% in<br>>75%<br>samples    |
| <b>Cell culture supernatants</b> | NT                                                 | NT                                                 | AS<br>34% in >75%<br>of samples               | AS<br>47% in >75%<br>samples                  | NT                                 |
| <b>Dried blood spots</b>         | NT                                                 | NT                                                 | NT                                            | AS<br>73% in >75%<br>of samples               | AS<br>54% in<br>>75% of<br>samples |

AS - Run in Analysis Service

NT - Not Tested

## References

- Assarsson E, Lundberg M, Holmquist G, Björkesten J, Thorsen SB, Ekman D, Eriksson A, Rennel Dickens E, Ohlsson S, Edfeldt G, Andersson A-C, Lindstedt P, Stenvang J, Gullberg M, and Fredriksson S. Homogenous 96-plex PEA immunoassay exhibiting high sensitivity, specificity, and excellent scalability. *PLOS one* (2014).
- Enroth S, Johansson Å, Bosdotter Enroth S and Ulf Gyllensten U. Strong effects of genetic and lifestyle factors on biomarker variation and use of personalized cutoffs. *Nature Communications*. (2014).
- Chen H, Zucknick M, Werner S, Knebel P, Brenner H. Head-to-Head Comparison and Evaluation of 92 Plasma Protein Biomarkers for Early Detection of Colorectal Cancer in a True Screening Setting. *Clin Cancer Res*. (2015).
- Andreasson U, Blennow K and Zetterberg H. Update on ultrasensitive technologies to facilitate research on blood biomarkers for central nervous system disorders. *Alzheimer's & Dementia* (2016).

## NPX, QC and CV

### Calculation of NPX

Normalization of the Ct values derived from the qPCR detection step improves precision and makes data more intuitive (higher value = higher protein concentration). NPX (Normalized Protein eXpression) represents the relative signal (on log<sub>2</sub> scale) and is used for downstream statistical analyses.

1. Extension Control:

$$Ct_{\text{analyte}} - Ct_{\text{Ext Ctrl}} = dCt_{\text{analyte}}$$

2. Interplate Control:

$$dCt_{\text{analyte}} - dCt_{\text{Interplate Ctrl}} = ddCt$$

3. Normalization against a correction factor:

$$\text{Correction factor} - ddCt = \text{NPX}$$

- Protein expression changes are measured for each protein separately by relative quantification
- Even if two different proteins have the same NPX values, their actual concentration may differ
- NPX should be compared between samples within a run for each assay separately
- NPX cannot be directly compared between runs

## Quality control

Olink has built-in quality controls in all multiplex panels. Each 92-plex panel contains 96 assays. Four of those are internal controls that allow for an in-process quality control designed to monitor different steps of the protocol: immuno reaction, extension and amplification/ detection.

- The two incubation controls consist of two different non-human antigens measured with PEA assays: Incubation Control 1 and 2. These controls monitor potential variation in all three steps of the reaction.
- The Extension Control is an antibody coupled to both DNA-tags (hence always in proximity). This control monitors the extension and amplification/detection step.
- The Detection Control is a complete double stranded DNA amplicon which does not require any proximity binding or extension step. This control monitors the amplification/detection step.

The internal controls are used for both sample and run QC. The quality control of data is performed separately for each sample plate.

### **Sample QC**

Each of the internal controls are spiked into the samples in the same concentration. The signal for these are therefore expected to be the same over the plate. Sample QC is performed using the Detection Control and Incubation Control 2. Within each run, the levels of these controls are monitored for each sample and compared against the median of all samples. If either of the controls deviate more than the acceptance criteria allow (see below), the sample is flagged.

The Extension Control is used in the normalization step and in generation of NPX, and hence not included in the quality control of data.

The IPC cannot flag on the Detection control. This function was removed already from the start, as the large number of extensions that is required for the IPC made the IPC to always be a bit behind the rest of the samples. I.e., the IPC would always flag on the Detection control. It is however always constant, and flagging on the Detection control was therefore excluded.

Acceptance criteria for passing a sample:

- Incubation Control 2 and Detection Control deviates  $< \pm 0.3$  NPX from plate median.

### **Run QC**

The internal controls are used also in the run QC. This QC assesses the variation over the plate for each of the Incubation Controls 1 and 2 and the Detection Control. If the variation for one of the controls is too large (see below) the entire run is considered unreliable.

Acceptance criteria for passing a run:

- Standard deviation of Incubation Control 1 & 2 and Detection Control:  $< 0.2$  NPX.
- Number of flagged samples:  $\leq 1/6$  of total number of samples (i.e.  $\leq 16$  in a full plate).

### **Correction factor**



The correction factor is calculated during the validation of the panels. It is a pre-determined value, a fixed background, used to shift signals to a more intuitive value. Several runs during the validation process is used for this. Data from all assays are used but only IPC and negative control are needed from the samples. A minimum of 12 runs is performed. All runs should have at least three IPCs and three negative controls. Median is used in the final steps of the calculations to make the analysis less sensitive for extreme values.

Calculation of correction factor

1. Normalize using extension control:

$$Ct_{\text{sample assay (x)}} - Ct_{\text{sample assay (ext ctrl)}} = dCt_{\text{sample assay (x)}}$$

2. Normalize using median IPC (per experiment):

$$dCt_{\text{sample assay (x)}} - \text{Median } dCt_{\text{IPC assay (x)}} = ddCt_{\text{sample assay (x)}}$$

3. Calculate average value for background (per experiment):

$$\text{Average } (ddCt_{\text{background assay(x)}}) = Bg \text{ IPC}_{(x)}$$

4. Calculate median value for the background of all assays:

$$\text{Median } (Bg \text{ IPC}_{(x)})$$

Since the background is shifting within an interval, this interval is usually estimated by assuming normal distribution and selecting which interval to use. Olink uses a confidence interval of 99% (+/- 3xSD from the background). As the customer is recommended to run only three background samples in every run, this will not be enough to exactly calculate the standard deviation for the background. Therefore, we have a fixed value for this, which is selected from the same data as the Correction Factor. In contrast to the correction factor, fixed SD has a function and impact on the data.

Normalization

Olink NPX Manager has three available methods for data normalization and minimization of systematic biases between sample plates. These methods are described below. An important concept when deciding on normalization procedure is randomization, which in this context applies to the sample placement across the plates. For randomized studies with more than one plate, intensity normalization is the default normalization. For other studies, IPC normalization is default.

### **IPC normalization**

Three inter-plate controls (IPC) are included on each plate and run as normal samples. The inter-plate control is a pool of 92 antibodies, each with one of the pairs of unique DNA tags on it positioned in fixed proximity (i.e. 92 Extension Controls).

The median of the three IPCs is used as normalizer for each assay, and this compensates for potential variation between runs/plates. This method is completely independent on the samples included on the plate and is therefore recommended for projects where complete randomization of samples cannot be guaranteed.

### **Intensity normalization**

The intensity normalization adjusts the data so that the median NPX for a protein on each plate is equal to the overall median. Each plate is adjusted so that the median of all assays is the same on all plates.

This method requires that the true median of each plate is the same. One way of ensuring this is to randomize the samples beforehand. If there is total randomization, this method outperforms other normalization methods. If there are specific types of samples that are only available on certain plates, this normalization method should not be used.

### **Control normalization**

The control normalization works in the same way as the IPC normalization, but with one addition. While the IPC adjusts each protein to the level of a reference, the control normalization also adjusts the total intensity of entire plates. This is useful if you have plates or projects that differ on average in a way that cannot be explained biologically. Control normalization can be used to reduce systematic variation in non-randomized studies. This normalization method requires the addition of at least two control samples on each plate.

NOTE This is an optional normalization method that should only be used when standard normalizations are not sufficient.

### **Coefficient of variation**

%CV is calculated using linear NPX values from replicate control samples, for assays detected above LOD.

Intra-CV represents the CV within a plate and inter-CV represents the CV between plates. The reported %CV is the mean %CV over all assays.

Coefficient of Variation = (Standard Deviation / Mean) \* 100

- Reference value for Inter %CV: < 25%
- Reference value for Intra %CV: < 15%
